1 **Cultivation and genomics of the first freshwater SAR11 (LD12) isolate**

2

3 Michael W. Henson<sup>1</sup>, V. Celeste Lanclos<sup>1</sup>, Brant C. Faircloth<sup>1,2</sup>, and J. Cameron Thrash<sup>1,3</sup>

4

5 1. Department of Biological Sciences, Louisiana State University, Baton Rouge, LA 70803,  
6 U.S.A.

7

8 2. Museum of Natural History, Louisiana State University, Baton Rouge, LA 70803, U.S.A.

9

10 3. Materials and Correspondence:

11 J. Cameron Thrash

12 Department of Biological Sciences

13 202 Life Sciences Bldg.

14 Louisiana State University

15 Baton Rouge, LA 70803

16 thrashc@lsu.edu

17 225-578-8210

18

19

20

21 Key Words: LD12, SAR11, freshwater microbiology, genomics, physiology

22 **Abstract**

23 Evolutionary transitions between fresh and salt water happen infrequently among  
24 bacterioplankton. Within the ubiquitous and highly abundant heterotrophic  
25 Alphaproteobacteria order *Pelagibacterales* (SAR11), most members live in marine  
26 habitats, but the LD12 subclade has evolved as a unique freshwater lineage. LD12 cells  
27 occur as some of the most dominant freshwater bacterioplankton, yet this group has  
28 remained elusive to cultivation, hampering a more thorough understanding of its biology.  
29 Here, we report the first successful isolation of an LD12 representative, strain LSUCC0530,  
30 using high throughput dilution to extinction cultivation methods, and its complete genome  
31 sequence. Growth experiments corroborate ecological data suggesting active populations  
32 of LD12 in brackish water up to salinities of ~5. LSUCC0530 has the smallest closed  
33 genome thus far reported for a SAR11 strain (1.16 Mbp). The genome affirms many  
34 previous metabolic predictions from cultivation-independent analyses, like a complete  
35 Embden-Meyerhof-Parnas glycolysis pathway, but also provides novel insights, such as the  
36 first isocitrate dehydrogenase in LD12, a likely homologous recombination of malate  
37 synthase from outside of the SAR11 clade, and analogous substitutions of ion transporters  
38 with others that occur throughout the rest of the SAR11 clade. Growth data support  
39 metagenomic recruitment results suggesting temperature-based ecotype diversification  
40 within LD12. Key gene losses for osmolyte uptake provide a succinct hypothesis for the  
41 evolutionary transition of LD12 from salt to fresh water. For strain LSUCC0530, we  
42 propose the provisional nomenclature *Candidatus Fonsibacter ubiquis*.

43

## 44 **Introduction**

45 Bacterioplankton in the SAR11 clade of *Alphaproteobacteria* are dominant heterotrophs in  
46 marine and freshwater systems. In the oceans, SAR11 can represent 25-50% of total  
47 planktonic cells (Morris *et al.*, 2002, Schattenhofer *et al.*, 2009). Numerous subclades with  
48 unique spatio-temporal distributions comprise SAR11 (Carlson *et al.*, 2009, Giovannoni and  
49 Vergin, 2012, Morris *et al.*, 2002, Thrash *et al.*, 2014). At least nine subclades defined via  
50 16S rRNA gene sequences occupy marine niches (Giovannoni and Vergin, 2012), and more  
51 likely exist (Tsementzi *et al.*, 2016). However, in spite of its global distribution (Morris *et*  
52 *al.*, 2002), massive predicted population size of  $10^{28}$  cells (Morris *et al.*, 2002), and an  
53 estimated divergence time from its last common ancestor of 1.1 billion years ago (Luo *et*  
54 *al.*), the bulk of existing evidence suggests that SAR11 has only successfully colonized  
55 freshwater environments once in its natural history (Eiler *et al.*, 2014, Logares *et al.*, 2010,  
56 Salcher *et al.*, 2011). Traditionally, all known freshwater SAR11 belong to subclade IIIb,  
57 a.k.a. LD12. However, a recent report challenges this assertion: a genome sister to subclade  
58 I was recovered in Lake Baikal metagenomic data (Cabello-Yeves *et al.*, 2018). Regardless,  
59 the limited evolutionary diversification into less saline habitats has not prevented LD12  
60 from achieving prominence in the ecosystems it inhabits. In many lotic and lentic  
61 environments, LD12 occupies similar relative abundances as its marine cousins (Dupont *et*  
62 *al.*, 2014, Garcia *et al.*, 2017, Henson *et al.*, 2016, Newton *et al.*, 2011, Salcher *et al.*, 2011).  
63 Study of LD12 is important to understand SAR11 evolution, specifically, and how successful  
64 transitions between marine and freshwater environments occur in bacterioplankton  
65 (Logares *et al.*, 2009), more generally.

66 Ecological, functional, and sequence-based inference from single amplified genomes  
67 (SAGs) and metagenomes support the hypothesis that LD12 bacterioplankton evolved from  
68 a genome-streamlined marine ancestor (Eiler *et al.*, 2016, Luo *et al.*, 2013, Salcher *et al.*,  
69 2011, Zaremba-Niedzwiedzka *et al.*, 2013). As such, they share many of the same  
70 characteristics as marine SAR11, such as small cell volumes; adaptation to oligotrophic  
71 habitats; small, streamlined genomes; an obligate aerobic chemoorganoheterotrophic  
72 lifestyle with limited metabolic flexibility; preference for small molecular weight  
73 compounds like carboxylic and amino acids as carbon/energy sources; and auxotrophies  
74 for some amino acids and vitamins (Dupont *et al.*, 2014, Eiler *et al.*, 2014, Eiler *et al.*, 2016,  
75 Giovannoni *et al.*, 2005a, Giovannoni *et al.*, 2005b, Grote *et al.*, 2012, Salcher *et al.*, 2011,  
76 Schwalbach *et al.*, 2010, Sun *et al.*, 2011, Thrash *et al.*, 2014, Tripp *et al.*, 2008, Zaremba-  
77 Niedzwiedzka *et al.*, 2013). Previous research suggests that LD12 differ from their marine  
78 counterparts in specific elements of metabolic potential that indicate a greater emphasis on  
79 production, rather than uptake, of osmolytes, and important metabolic changes related to  
80 energy production (Dupont *et al.*, 2014, Eiler *et al.*, 2016). For example, metagenomic  
81 population data showed a correlation between decreased salinity and greater proportion of  
82 the Embden-Meyerhof-Parnass (EMP) vs. Entner-Doudoroff (ED) glycolysis pathways  
83 (Dupont *et al.*, 2014). Comparative genomic analyses of SAGs from different SAR11 strains

84 concurred: LD12 genomes contained the EMP pathway that is not found in most marine  
85 SAR11 (Eiler *et al.*, 2016, Grote *et al.*, 2012). SAG data also suggested that LD12 lacks the  
86 glyoxylate shunt and some single carbon (C1) metabolism (Eiler *et al.*, 2016).

87 Despite what has been learned from cultivation-independent methods, the lack of  
88 cultured LD12 representatives has hampered a more detailed exploration of the group.  
89 Potential ecotypes within LD12 have been identified (Zaremba-Niedzwiedzka *et al.*, 2013),  
90 and their population dynamics recently described with five-year time series data in  
91 freshwater lakes (Garcia *et al.*, 2017). However, we cannot delineate what distinguishes  
92 ecotypes without better physiological and genomic data. Similarly, interpreting data on the  
93 ecological distribution of LD12 remains challenging without information on growth  
94 tolerances and optima for salinity and temperature. We also don't understand whether a  
95 connection exists between more efficient energy production through EMP-based glycolysis  
96 and the freshwater lifestyle, or what other adaptations might explain LD12 evolution away  
97 from salt water.

98 The next steps in translating 'omics-based predictions into measured data for  
99 integration with ecosystem models require living experimental subjects. For example,  
100 cultures of marine SAR11, such as HTCC1062 and HTCC7211, have facilitated testing of  
101 metabolism and growth (Carini *et al.*, Carini *et al.*, Giovannoni *et al.*, 2005a, Schwalbach *et al.*,  
102 *et al.*, 2010, Smith *et al.*, Smith *et al.*, Steindler *et al.*, 2011, Tripp *et al.*, 2008), structural  
103 organization (Zhao *et al.*, 2017), and virus-host interactions (Zhao *et al.*, 2013). We need  
104 cultivated representatives to provide this kind of understanding of other important  
105 bacterioplankton like LD12. In service of this goal, we pursued a systematic high  
106 throughput cultivation effort from coastal regions in the northern Gulf of Mexico. Here, we  
107 report the first isolation of a member of the LD12 clade, strain LSUCC0530, its complete  
108 genome sequence, preliminary physiological data, and an examination of the ecological  
109 distribution of this organism compared with other LD12 clade members. Our results  
110 provide evidence for temperature-dependent ecotype diversification within LD12 and a  
111 hypothesis about the evolutionary trajectory that led to LD12 colonization of fresh water.

112

## 113 **Results**

### 114 *Isolation and growth of LSUCC0530*

115 We isolated strain LSUCC0530 as part of a series of high throughput dilution-to-extinction  
116 cultivation experiments (HTC) conducted with inoculation water obtained across the  
117 southern Louisiana coast. The particular experiment that yielded LSUCC0530 utilized  
118 surface water from the coastal lagoon of Lake Borgne, 39 km southeast of New Orleans. At  
119 the time of collection, the surface water had a salinity of 2.39 and was 30.5°C. Subsequent  
120 community analysis demonstrated that LD12-type organisms represented 8.7% of the  
121 bacterioplankton population in the inoculum (see below). We diluted 2.7 µm-filtered Lake  
122 Borgne surface water for inoculation to an estimated 2 cells well<sup>-1</sup> into our JW5 medium  
123 (salinity 1.45, Table S1), and incubated cultures for 30 days at 23°C (room temperature in



124 the Thrash Lab). LSUCC0530 grew slowly, reaching  $8.6 \times 10^5$  cells mL<sup>-1</sup> after 24 days. It had  
125 a low fluorescence/low side scatter flow cytometric signature characteristic of other  
126 SAR11 cells (Fig. S1).

127

### 128 *Taxonomy and morphology*

129 The LSUCC0530 16S rRNA gene sequence had > 99% identity with eight SAG sequences  
130 from members of LD12 (Zaremba-Niedzwiedzka *et al.*, 2013) and only 91% and 92%  
131 sequence identity with sequences from the sister subclade IIIa representatives IMCC9063  
132 and HIMB114, respectively. Of note for taxonomic incorporation of genomic data (Chun *et al.*,  
133 2018), the genome-generated 16S rRNA gene sequence matched the PCR-generated 16S  
134 rRNA gene sequence (GenBank accession number KY290650.1) at 1316 of 1320 sites. Two  
135 of these mismatches were single bp gaps the genome sequence, and three of the four  
136 mismatches occurred in the first 20 bp of the PCR-generated sequence. LSUCC0530 also  
137 had average amino acid identities (AAI) of 58.1% and 59.7% with HIMB114 and IMCC9063,  
138 respectively (Table S1). In contrast, AAI between LSUCC0530 and the LD12 SAGs ranged  
139 from 81.9% to 88.0%, corroborating that LSUCC0530 belongs to separate species from  
140 subclade IIIa (Konstantinidis and Tiedje, 2007). Phylogenetic inference using 16S rRNA  
141 genes placed LSUCC0530 within the Order *Pelagibacteriales* (a.k.a. SAR11 (Thrash *et al.*,  
142 2014)), in monophyly with the original LD12 clone library sequence (Fig. S2).

143 Phylogenomic inference using 83 single copy marker genes from 49 SAR11 genomes also  
144 strongly supported placement of LSUCC0530 within LD12 as an early diverging member,  
145 with only the SAG AAA280-B11 from Lake Damariscotta diverging earlier (Fig. 1A). This  
146 tree also recovered the three microclusters within LD12 (A, B, C) observed previously  
147 (Zaremba-Niedzwiedzka *et al.*, 2013) (Fig. 1A). Cells of strain LSUCC0530 were small,  
148 curved rods, approximately 1  $\mu\text{m} \times 0.1 \mu\text{m}$  (Fig. 1B, C), showing conserved morphology  
149 with the distantly related SAR11 strain HTCC1062 in subclade Ia (Rappé *et al.*, 2002, Zhao  
150 *et al.*, 2017).

151

### 152 *Genome characteristics*

153 Genome assembly resulted in a single, circularized scaffold that we tested for completeness  
154 using multiple tools (Supplemental Information). The completed genome is 1,160,202 bp  
155 with a GC content of 29.02% and 1271 predicted genes (Fig. 2). There are 1231 putative  
156 protein coding genes and 40 RNA genes, including one each of the 5S, 16S, and 23S rRNA  
157 genes. We found no genomic evidence of lysogenic bacteriophage or a CRISPR-*cas* system.  
158 LSUCC0530 has the characteristics of genome streamlining previously reported for other  
159 SAR11 genomes, with an estimated coding percentage of 96.36% and the smallest complete  
160 SAR11 genome reported thus far (Giovannoni *et al.*, 2005b, Grote *et al.*, 2012). Despite its  
161 smaller overall genome size, intergenic spacer regions are not significantly smaller than  
162 those of the sister subclade IIIa (Fig. S3). All LD12 genomes had much higher AAI and  
163 synteny with each other than with the subclade IIIa (Table S1), mirroring their

164 phylogenomic relationships (Fig. 1A). However, within the LD12 clade, AAI and synteny  
165 percentages did not clearly delineate the same patterns we observed in the phylogenomic  
166 tree, which may have resulted from the LD12 SAGs being fragmented and incomplete.

167 The LSUCC0530 genome has the conserved architecture for hypervariable region 2  
168 (HVR2) that has been observed in most other complete SAR11 genomes (Grote *et al.*, 2012,  
169 Rodriguez-Valera *et al.*, 2009, Wilhelm *et al.*, 2007) and other LD12 SAGs (Zaremba-  
170 Niedzwiedzka *et al.*, 2013), between the 16S rRNA-tRNA-tRNA-23S rRNA operon and the  
171 5S rRNA gene operon. This region is 54,755 bp and has a strong variation in GC content  
172 from neighboring parts of the genome (Fig. 2). Metagenomic recruitment also verified this  
173 region as hypervariable based on the lack of matching sequences in community data (Fig.  
174 S4). The predicted gene annotations in HVR2 resemble those in the same location in other  
175 SAR11 genomes (Grote *et al.*, 2012, Zaremba-Niedzwiedzka *et al.*, 2013), namely genes  
176 likely functioning in membrane modification such as glycosyltransferases, epimerases,  
177 transaminases, and methyltransferases; as well as hypothetical proteins.

#### 178 179 *Metabolic reconstruction*

180 Like most other SAR11s (Eiler *et al.*, 2016, Grote *et al.*, 2012, Thrash *et al.*, 2014), the  
181 LSUCC0530 genome encodes for an obligate aerobic lifestyle, with a complete oxidative  
182 phosphorylation pathway including a heme/copper-type cytochrome c oxidase, a proton-  
183 translocating NADH dehydrogenase, and a proton-translocating ATP synthase (Fig. 3). As  
184 previously detected in LD12 SAGs (Eiler *et al.*, 2016), the LSUCC0530 genome encodes a  
185 complete EMP glycolysis pathway, including phosphofructokinase and pyruvate  
186 dehydrogenase, and complete gluconeogenesis through nucleotide sugar production (Fig.  
187 3). We recovered genes for the pentose phosphate pathway and a predicted fructokinase  
188 gene for conversion of D-fructose to  $\beta$ -D-fructose-6-P. As expected based on other SAR11  
189 genomes, we did not find annotated genes for utilization of allose, fucose, fuculose,  
190 galactose, maltose, mannose, rhamnose, sucrose, starch, trehalose, or xylose. LSUCC0530  
191 has a complete TCA cycle and glycolate oxidase, and like other SAR11s, the non-mevalonate  
192 pathway for isopentenyl diphosphate (Fig. 3).

193 We recovered the first isocitrate lyase in an LD12 genome, conferring a complete  
194 glyoxylate bypass in combination with malate synthase. The isocitrate lyase shares its  
195 ancestry with the majority of the SAR11 clade except subclade IIIa, where it appears to  
196 have been lost (Eiler *et al.*, 2016, Grote *et al.*, 2012) (Fig. S5). However, the LSUCC0530  
197 malate synthase shared with other LD12 SAGs belongs to isoform A, whereas all other  
198 SAR11 clades contain isoform G (Anstrom *et al.*, 2003) (Figs. 3; S6). Comparison of gene  
199 neighborhoods in a variety of SAR11 genomes revealed that both isoforms occur in the  
200 same location (Fig. S7).

201 We predict production of eighteen amino acids (Fig. 3) and partial synthesis  
202 pathways for three more (histidine, cysteine, and methionine), as well as the ability to  
203 interconvert, but not synthesize *de novo*, phenylalanine and tyrosine. The LSUCC0530

204 genome has lost some of the C1 and methylated compound pathways found in other  
205 SAR11s (Sun *et al.*, 2011). For example, as in the LD12 SAGs (Eiler *et al.*, 2016), LSUCC0530  
206 does not have DMSP, methylamine, or glycine-betaine metabolism. However, it retains  
207 tetrahydrofolate metabolism, formate oxidation, and the glycine cleavage pathway (Fig. 3).

208 The genome has the same PII nitrogen response system and *amtB* ammonium  
209 transporter found in other SAR11s and is predicted to utilize ammonia as a nitrogen source  
210 in amino acid synthesis (Fig. 3). The genome also encodes a putative thiosulfate/3-  
211 mercaptopyruvate sulfurtransferase that may be involved in sulfur and thiocyanate  
212 reactions (Fig. 3). A possible product of this enzyme is sulfite, which could be further  
213 oxidized to sulfate in the periplasm via putative *sorAB* genes. This gene pair occurs  
214 infrequently in the SAR11 clade, but sulfite oxidation may serve, in some strains, as a  
215 means to generate additional proton motive force (Denger *et al.*, 2008, Kappler, 2011). This  
216 is similar to the function conferred by proteorhodopsin (Béjà *et al.*, 2001, Giovannoni *et al.*,  
217 2005a, Steindler *et al.*, 2011), which the LSUCC0530 genome also contains. Also like other  
218 SAR11s, a complete assimilatory sulfate reduction pathway is missing, making LSUCC0530  
219 dependent on reduced sulfur compounds for cellular sulfur requirements (Tripp *et al.*,  
220 2008). In our media, this was supplied in the form of sulfur-containing amino acids (Table  
221 S1). The genome encodes partial pathways for incorporation of sulfide into cysteine and  
222 methionine but is missing predicted serine O-acetyltransferase and homoserine O-  
223 succinyltransferase genes (Fig. 3).

224 In addition to the PII nitrogen sensor, LSUCC0530 also has putative two component  
225 systems handling phosphate limitation, pH, osmotic upshift via potassium, and redox state  
226 (Fig. 3). The LSUCC genome encodes ABC transporters for phosphate (*ptsABCS*),  
227 lipoprotein, and branched-chain and L amino acid uptake. We identified tripartite ATP-  
228 independent periplasmic (TRAP) transporter genes for C4-dicarboxylate and  
229 mannitol/chloroaromatic compounds. However, the gene cluster appears to be missing the  
230 substrate binding subunit, and we did not find predicted genes for mannitol utilization.

231 In general, LSUCC0530 and the LD12 SAGs share many of the same pathways for  
232 osmolyte synthesis as the subclade IIIa and other SAR11 organisms, such as N-acetyl-  
233 ornithine, glutamate, glutamine, and proline (Table 1). In some cases, there appear to be  
234 analogous substitutions in osmolyte transport systems. For example, LD12 genomes have  
235 potassium antiporters, but not the *trkAH* genes for potassium transport in other SAR11s.  
236 Similarly, a sodium/proton antiporter orthologous cluster comprised genes exclusively from  
237 LD12 genomes, but a separate sodium/proton antiporter occurred in all other SAR11  
238 genomes (Table 1). Perhaps the most important difference in genomic content concerning  
239 osmolytes occurs in two key transporter losses: LSUCC0530 and the other LD12s have no  
240 genes for the glycine betaine/proline or ectoine/hydroxyectoine ABC transporters that are  
241 present in HIMB114 and IMCC9063 and other subclades of SAR11 (Table 1).

242  
243 *Physiology*

244 Under isolation conditions (23°C, JW5 medium), strain LSUCC0530 grew to a density of 2 x  
245 10<sup>7</sup> cells mL<sup>-1</sup> with an average growth rate of 0.52 day<sup>-1</sup>. Our physiological experiments to  
246 determine the salinity tolerance and growth optima revealed that LSUCC0530 could grow  
247 at salinities between 0.36 and 4.7 (Fig. 4A). The optimal salinity for LSUCC0530 was at or  
248 below the isolation medium of 1.45. Growth rates decreased between salinities of 2.9 and  
249 4.7 (Fig. 4A), and cells died (determined by rapid loss of flow cytometric signal) in salinities  
250 above 8 (Fig. S8). We observed growth after a very extended lag phase in a subset of  
251 cultures at salinity 5.8, but could not always reproduce this growth in repeated  
252 experiments (Fig. S8). Among the temperatures tested, LSUCC0530 grew optimally at 23°C,  
253 and we observed growth up to 30°C, but not at 12°C or below, nor at 35°C or above (Fig.  
254 4B). However, we did not observe a clear loss of signal at 4, 12, 35, or even 40°C (Fig. S8),  
255 even after over 33 days, suggesting that LSUCC0530 can endure extended periods at these  
256 temperatures in a non-growth state. Notably during growth experiments, one of the five  
257 replicates during any given experiment frequently grew at a reduced rate than the others  
258 (Fig. S8).

259

### 260 *Ecology*

261 We quantified the abundance of LD12 taxa in the coastal Louisiana ecosystems using 16S  
262 rRNA gene sequences clustered into operational taxonomic units (OTUs). These sequences  
263 were obtained as part of the combined sampling and HTC campaign that included the  
264 successful isolation of LSUCC0530. Based on BLASTn sequence similarity, the  
265 representative sequence for OTU7 and LSUCC0530 shared 100% identity over the 250bp  
266 v4 region of the 16S rRNA gene, confirming the Mothur classification of OTU7 as belonging  
267 to the SAR11 LD12 clade. Over the three-year sampling period, OTU7 was the fifth most  
268 abundant OTU based on total read abundance and sixth ranked OTU based on median read  
269 abundance. At the time of sampling for the experiment that resulted in the isolation of  
270 LSUCC0530, OTU7 had a relative abundance of 8.7% in Lake Borgne. In some sites, such as  
271 the Atchafalaya River Delta (salinity 0.18), LD12 represented as much as 16% of total  
272 bacterioplankton (Fig. S9). Generally, the LD12 OTU7 relative abundance correlated  
273 negatively with salinity. At seven sites with salinities below 6, OTU7 had a relative  
274 abundance of 4.0% or greater with a median relative abundance of 8.8% (Fig. S9). At the  
275 remaining ten sites above a salinity of 6 (median 19.44), OTU7 had relative abundances  
276 around 2% or lower (Fig. S9).

277 The phylogenetic separation of LSUCC0530 from B11 and the IIIb A-C microclusters  
278 raised the question of whether LSUCC0530 represents a novel ecotype with unique  
279 spatiotemporal distribution compared to other LD12 taxa. Therefore, we explored the  
280 distribution of LD12 genomes in 90 fresh and brackish water environments through  
281 competitive recruitment of metagenomic sequences to all the SAR11 genomes in the  
282 phylogenomic tree and the outgroup sequence HIMB59. We quantified relative abundance  
283 via recruited reads (per kpb of metagenomic sequence per Mbp of genome sequence-

284 RPKM), and aggregated LD12 data based on the A, B, and C microclusters (Fig. 1A), the B11  
285 SAG, and LSUCC0530. Figure 5A displays RPKM values for reads with  $\geq 95\%$  identity,  
286 roughly corresponding to a species delineation via average nucleotide identity  
287 (ANI)(Konstantinidis and Tiedje, 2005), but we also provide additional comparisons at  $\geq$   
288 85, 90, 92, 98, and 100% identity (Fig. S10).

289 All LD12 subgroups had their highest RPKM values in very low salinity sites,  
290 although we could detect LD12 across various brackish salinities (Fig. 5A). In general, IIIb.A  
291 and LSUCC0530 averaged the highest relative abundances across all sites with salinities  
292 between 0 and 5.75. All subgroups showed site-specific variation in abundances (Fig. 5A).  
293 Microcluster IIIb.A clearly dominated recruitment at Lake Michigan, whereas LSUCC0530  
294 represented the most abundant genome at Feitsui Reservoir and Lake Gatun (Fig. 5A).

295 We repeated the previous examination of recruitment density to the different  
296 microclusters across a range of percent identities, now including LSUCC0530 (Garcia *et al.*,  
297 2017). We corroborate observed patterns indicating additional LD12 diversity beyond that  
298 represented in the current genomes, despite the inclusion of our new representative. For  
299 example, whereas the LSUCC0530 genome recruited the majority of high percent identity  
300 reads in the Feitsui Reservoir and Lake Gatun samples (Fig. 5B), in some locations the  
301 majority of recruitment to this genome centered around lower percent identity hits (Fig.  
302 5C). We observed the same kind of alternative patterns for the other microclusters as well  
303 (Fig. 5D). As noted by our colleagues, since reads were competitively recruited against all  
304 close relative genomes, these cases where a microcluster primarily recruited reads  $\sim 90$ -  
305 92% identity likely mean that we lack a representative genome for that fraction of the  
306 metagenomic data (Garcia *et al.*, 2017).

307

## 308 Discussion

309 Our successful cultivation of an LD12 strain for the first time has demonstrated that this  
310 organism shares many physiological traits with cultured marine SAR11 representatives,  
311 and also has some important distinctions. LSUCC0530 doubles roughly once every two  
312 days, similar to taxa in subclade Ia (Rappé *et al.*, 2002) and Ib (Jimenez-Infante *et al.*, 2017).  
313 It has an aerobic, chemoorganoheterotrophic lifestyle, thriving in oligotrophic media with  
314 simple carbon compounds and likely depends on reduced organosulfur compounds and  
315 ammonium as its sulfur and nitrogen sources, respectively. Cell size and shape showed  
316 considerable morphological conservation (small, curved rods roughly  $1 \times 0.1 \mu\text{m}$ ) across  
317 large evolutionary distances (LD12 vs. subclade Ia  $\sim 89\%$  16S rRNA gene identity).  
318 Although a systematic survey of salinity tolerance has not been conducted for other  
319 cultured SAR11 representatives, we have shown that LD12 cannot survive in media with  
320 salinities over eight, whereas all other cultured SAR11 grow in seawater salinities (Carini *et al.*,  
321 2013, Jimenez-Infante *et al.*, 2017, Rappé *et al.*, 2002, Song *et al.*, 2009, Stingl *et al.*,  
322 2007). LSUCC0530 thrives in relatively high temperatures (23-30°C), and we could not



323 confirm growth at low temperatures in which other SAR11 have been isolated (Song *et al.*,  
324 2009).

325 LSUCC0530 shares many genomic characteristics with marine SAR11, such as a  
326 small, streamlined genome with few paralogs, short intergenic spaces, and a conserved  
327 hypervariable region, confirming predictions from LD12 SAGs and metagenomes (Eiler *et*  
328 *al.*, 2016, Newton *et al.*, 2011, Zaremba-Niedzwiedzka *et al.*, 2013). The LSUCC0530  
329 genome also encodes much of the same metabolic potential as what has been reported  
330 through LD12 SAGs and metagenomic data. For example, we confirm the EMP glycolysis  
331 pathway, TCA cycle, non-mevalonate terpenoid biosynthesis, numerous amino acid  
332 synthesis pathways, TRAP transporters for C4 dicarboxylate compounds, and ABC  
333 transporters for various amino acids. We can confirm the lack of a phosphoenolpyruvate  
334 carboxylase (*ppc*) and missing pathways for DMSP, glycine-betaine, and methylamine  
335 metabolism.

336 We have also recovered important genetic information previously unknown for  
337 LD12. At 1.16 Mbp, LSUCC0530 has a smaller genome, with fewer genes, than any other  
338 SAR11. LSUCC0530 has a complete glyoxylate bypass, which differs from previous  
339 inferences using SAGs (Eiler *et al.*, 2016). The unusual LD12 malate synthase isoform A  
340 gene occupies the same genomic location in LSUCC0530 as the isoform G copy in most  
341 subclade Ia, Ic, and IIIa genomes, with the exception of HIMB114 (Fig. S7). Therefore, the  
342 most parsimonious explanation for the presence of isoform A in LSUCC0530 is a  
343 homologous recombination event that replaced the isoform G homolog. The LSUCC0530  
344 genome also contains putative pathways for oxidation of sulfide, thiosulfate, and sulfite,  
345 which have not yet been explored in any cultured SAR11.

346 The relative abundance data from coastal Louisiana and the isolation of an LD12  
347 strain from a coastal environment supports previous work indicating that LD12 occupies a  
348 much wider range of aquatic habitats than inland freshwater systems (Dupont *et al.*, 2014,  
349 Herlemann *et al.*, 2014, Piwosz *et al.*, 2013, Salcher *et al.*, 2011). Questions have been raised  
350 as to whether these organisms occur in brackish waters as active and growing community  
351 members, or whether there are present simply as a result of freshwater input. LD12 cells  
352 have been shown to uptake thymidine in brackish water (Piwosz *et al.*, 2013). Our  
353 observation that LSUCC0530 can grow in slightly brackish water provides further evidence  
354 that such habitats may support LD12 cells as active community members. However, the  
355 relative competitiveness of LD12 within brackish microbial assemblages requires further  
356 research.

357 Metagenomic recruitment provides evidence that LD12 has diversified into multiple  
358 ecotypes with unique distributions (Fig. 5A) (Garcia *et al.*, 2017, Zaremba-Niedzwiedzka *et*  
359 *al.*, 2013). Furthermore, our data suggests that LSUCC0530 likely represents a novel LD12  
360 ecotype because it preferentially recruits metagenomic sequences at high percent identity  
361 in different locations than the other microclusters of LD12 (Fig. 5). What distinguishes the  
362 distribution of these ecotypes remains unclear. The observed patterns may represent

363 temporal variation captured in these sampling snapshots (Garcia *et al.*, 2017). Another  
364 possibility is that small variations in salinity optima for different ecotypes may drive  
365 diversification. However, given the paucity of low-brackish sites in available datasets, we  
366 cannot establish whether salinity plays a role in ecotype diversification. Furthermore,  
367 without complete genomes from other LD12 ecotypes, we cannot rule out whether variant  
368 ionic strength management strategies, or some other metabolic characteristic, help define  
369 evolutionary differences associated with ecotypes. For example, the ability to utilize  
370 different sulfur sources may distinguish LSUCC0530 from other LD12. The *sorAB* sulfite  
371 dehydrogenase and the thiosulfate/3-mercaptopyruvate sulfurtransferase genes have  
372 uneven distribution among SAR11 genomes, including within the LD12 subclade.

373 An alternative hypothesis is that temperature has driven diversification between  
374 ecotypes. A striking feature of LSUCC0530 is its growth preference for relatively high  
375 temperatures and inability to grow at low temperatures. While robust growth at 30°C may  
376 seem intuitive given that this represents typical Lake Borgne surface water temperature,  
377 the inability to grow at 12°C or below would likely place LSUCC0530-type LD12 cells at a  
378 fitness disadvantage in places like Lake Michigan, where annual water temperatures rarely  
379 get above 22°C and average temperatures remain below 15°C for the majority of the year  
380 (<https://coastwatch.glerl.noaa.gov/>). The metagenomic recruitment data support the  
381 temperature hypothesis: the samples in which LSUCC0530 dominated recruitment (Lake  
382 Gatun, Feitsui Reservoir) were all collected from locations having average temperatures  
383 above 19°C. Conversely, other microclusters dominated recruitment of samples from colder  
384 environments (e.g. IIIb.A in Lake Michigan)(Fig. 5). More sequence data may strengthen the  
385 relationship between temperature and ecotypes, but since temperature optima are  
386 extremely hard to infer from genomes alone, additional cultivars will be needed to test the  
387 temperature hypothesis for ecotype diversification.

388 A critical question remains for LD12. What has made these cells uniquely adapted to  
389 low salinity waters? Genomic analyses here and elsewhere (Dupont *et al.*, 2014, Eiler *et al.*,  
390 2016) have helped define the differences in LD12 metabolic potential compared to other  
391 SAR11, but very few adaptations appear related to salinity. It has been noted that the EMP  
392 pathway provides more ATP and NADH than the ED pathway, thus conferring greater  
393 energy conservation through glycolysis for LD12 cells than other SAR11s (Dupont *et al.*,  
394 2014, Eiler *et al.*, 2016). If or how this energy conservation relates to salinity adaptation  
395 has not been pursued. The presence of unique LD12 cation-proton antiporters (Fig. 3)  
396 could provide a connection. LD12 cells may benefit from additional NADH for the  
397 production of a proton motive force that drives the potassium-proton antiporters, thus  
398 improving active transport to lower internal ionic strength. However, while this adaptation  
399 may improve the ability of LD12 cells to live in fresh water, it doesn't explain why they  
400 have lost the ability to survive in salt water where their marine SAR11 cousins thrive.

401 The most likely explanation comes in the distribution of genes for osmolyte uptake.  
402 Critically, LSUCC0530, and LD12 in general, have lost the *proVWX* glycine-betaine/proline



403 ABC transporter shared by all other marine SAR11 (Table 1). Although a relatively minimal  
404 number of genes, this uptake capability likely represents a significant loss of function for  
405 LD12 salinity tolerance. In *Escherichia coli*, the *proVWX* operon has a strong promoter that  
406 upregulates these genes two orders of magnitude in response to increased salinity  
407 (Dattananda and Gowrishankar, 1989). Indeed, rapid proline uptake is a common response  
408 to osmotic upshift in many bacteria (Empadinhas and da Costa, 2008). Furthermore,  
409 LSUCC0530 and other LD12 genomes have lost the ABC transporters for  
410 ectoine/hydroxyectoine present in the other SAR11 genomes. Given the slow growth of  
411 LD12, rapid production of new intracellular osmolytes in response to increased salinity  
412 seems unlikely. Thus, the loss of these transport systems for quickly equilibrating  
413 intracellular osmolarity probably prevents successful dispersal of this organism into higher  
414 salinity waters.

415 This finding allows us to speculate further about the evolutionary trajectory that led  
416 to successful colonization of freshwater environments by LD12. All evidence suggests that  
417 the last common SAR11 ancestor was a marine organism with a streamlined genome  
418 (Logares *et al.*, 2010, Luo *et al.*, 2013, Zaremba-Niedzwiedzka *et al.*, 2013). During further  
419 diversification into subclade III, additional genes and pathways were lost, for example, *ppc*  
420 and genes for DMSP and some C1 compound metabolisms (Eiler *et al.*, 2016, Sun *et al.*,  
421 2016). Therefore, the common ancestor of subclade IIIa and LD12 would have had to adapt  
422 to freshwater environments starting with an already reduced genome and limited  
423 metabolic flexibility. A simple way to inhabit lower salinity environments would have been  
424 to decrease expression of, or altogether lose, genes for uptake and/or production of  
425 osmolytes. If the adaptation were reversible, we would expect to see examples of LD12  
426 organisms growing in marine systems. However, existing evidence suggests that while  
427 LD12 organisms can grow (established herein) and be active (Piwosz *et al.*, 2013) in low  
428 brackish conditions, they are not successful in higher salinity brackish or marine water  
429 (Dupont *et al.*, 2014, Herlemann *et al.*, 2014, Logares *et al.*, 2010, Salcher *et al.*, 2011). Thus,  
430 we propose that LD12 adaptation to fresh water involved irreversible loss of function,  
431 which decreased osmotic response capability in LD12 cells, thereby preventing  
432 recolonization of higher salinity environments. The missing ABC transporters for  
433 proline/glycine betaine and ectoine/hydroxyectoine in LD12 are likely candidates for this  
434 loss of function. Experimental tests on the differences in production and uptake of  
435 osmolytes among subclade IIIa and LD12 representatives will provide critical insight into  
436 how these different evolutionary paths have resulted in unique salinity ranges.

437  
438 For the first cultured representative of the LD12 clade, we propose the provisional  
439 taxonomic assignment for strain LSUCC0530 as '*Candidatus Fonsibacter ubiquis*',  
440

441 **Description of *Fonsibacter* gen. nov.**

442 *Fonsibacter* (*Fons* L. noun; fresh water, spring water, -bacter, Gr. adj.; rod, bacterium.  
443 *Fonsibacter* referring to the preferred low salinity habitat of this organism).

444  
445 Aerobic, chemoorganoheterotrophic, and oligotrophic. Cells are small, curved rods roughly  
446 1 x 0.1 µm. Non-motile. Based on phylogenomics and 16S rRNA gene phylogenetics,  
447 subclade IIIb/LD12 occurs on a separate branch within the *Pelagibacteraceae* (SAR11),  
448 sister to subclade IIIa containing strains HIMB114 and IMCC9063. Due to the depth of  
449 branching between these clades using concatenated protein-coding genes, and the 92%  
450 and 91% 16S rRNA gene sequence identity with HIMB114 and IMCC9063, respectively, we  
451 propose LSUCC0530 and subclade IIIb/LD12 as a novel genus in the *Pelagibacteraceae*.

452  
453 **Description of *Fonsibacter ubiquis* sp. nov.**

454 *Fonsibacter ubiquis* (L. adv. ubiquitous).

455  
456 In addition to the properties given in the genus description, the species is described as  
457 follows. Growth occurs at temperatures between 23°C and 30°C, but not at 11°C or below,  
458 nor at 35°C or above. Optimal salinity is 1.45 and below, and growth occurs between 0.36  
459 and 4.68. At optimal temperature and salinity, cells divide at an average rate of 0.52 day<sup>-1</sup>.  
460 Genome size is 1.16 Mbp, with 1271 predicted genes, and a GC content of 29.02%  
461 (calculated). LSUCC0530 had an ANI of 75.3% and 75.9% and an AAI of 58.1% and 59.7%  
462 with HIMB114 and IMCC9063, respectively. The genome is available on GenBank under  
463 accession number CP024034.

464  
465 The type strain, LSUCC0530<sup>T</sup>, was isolated from brackish water from the coastal lagoon  
466 Lake Borgne off the coast of southeastern Louisiana, USA.

467  
468

## 469 **Materials and Methods**

### 470 *Isolation and Identification of LSUCC0530*

471 Isolation, propagation, and identification of strain LSUCC0530 (subclade IIIb) was  
472 completed as previously reported (Henson *et al.*, 2016). Briefly, water was collected from  
473 the surface of the coastal lagoon Lake Borgne (Shell Beach, Louisiana) (29.872035 N, -  
474 89.672819 W) on 1 July, 2016. We recorded salinity on site using a YSI 556 MPS (YSI, Solon,  
475 OH, USA) (Table S1). Whole water was filtered through a 2.7 µm filter (Whatman), stained  
476 with 1X SYBR Green (Lonza, Basal, Switzerland), and enumerated using the Guava EasyCyte  
477 5HT flow cytometer (Millipore, Massachusetts, USA). After serial dilution, water was  
478 inoculated into five 96 x 2.1 mL well PTFE plates (Radleys, Essex, UK) containing 1.7 mL of  
479 JW5 medium at an estimated 2 cells well<sup>-1</sup>. Cultures were incubated at room temperature in  
480 the dark for three weeks and evaluated for growth using flow cytometry. Positive wells (>  
481 10<sup>4</sup> cells mL<sup>-1</sup>) were transferred in duplicate to capped, 125 mL polycarbonate flasks

482 (Corning, New York, USA) containing 50 mL of JW5 medium. Upon reaching a density of >  
483  $5.0 \times 10^5$  cells mL<sup>-1</sup>, cells were filtered onto 25 mm 0.22  $\mu$ m polycarbonate filters (Millipore,  
484 Massachusetts, USA), and DNA extractions were performed using the MoBio PowerWater  
485 DNA kit (QIAGEN, Massachusetts, USA) following the manufacturer's instructions. DNA was  
486 amplified as previously reported (Henson *et al.*, 2016) and sequenced at Michigan State  
487 University RTSF Genomics Core. Sanger sequences were evaluated using the freely  
488 available software 4Peaks (v. 1.7.1) (<http://nucleobytes.com/4peaks/>). Forward and  
489 reverse sequences were assembled using the CAP3 webserver  
490 (<http://doua.prabi.fr/software/cap3>), after reverse reads were converted to their reverse  
491 complement at [http://www.bioinformatics.org/sms/rev\\_comp.html](http://www.bioinformatics.org/sms/rev_comp.html). The PCR-generated  
492 16S rRNA gene sequence for strain LSUCC0530 is accessible on NCBI GenBank under the  
493 accession number KY290650.

494

#### 495 *Community iTag analysis*

496 Community DNA from 17 sites of various salinities was filtered, extracted, and analyzed  
497 following our previously reported protocol (Henson *et al.*, 2016). The sites sampled were  
498 Lake Borgne (LKB; Shell Beach, LA), Bay Pomme D'or (JLB; Buras, LA), Terrebonne Bay  
499 (TBon; Cocodrie, LA), Atchafalaya River Delta (ARD; Franklin, LA), Freshwater City (FWC;  
500 Kaplan, LA), Calcasieu Jetties (CJ; Cameron, LA). Each site was visited three times with the  
501 exception of TBon, which was visited only twice. Briefly, extracted DNA was sequenced at  
502 the 16S rRNA gene V4 region (515F, 806R) (Parada *et al.*, 2015), with Illumina MiSeq  
503 2x250bp paired-end sequencing at Argonne National Laboratories. 16S rRNA gene  
504 amplicon data was analyzed and classified (OTU<sub>0.03</sub>) with Mothur v.1.33.3 (Schloss *et al.*,  
505 2009) using the Silva v119 database (Pruesse *et al.*, 2007). To determine the best matching  
506 OTU for LSUCC0530, sequences from the OTU representative fasta files, provided by  
507 mothur using *get.oturep()*, were used to create a blast database (*formatdb*) against which  
508 the LSUCC isolate 16S rRNA genes could be searched via *blastn* (BLAST v 2.2.26). All best  
509 hits ranked at 100% identity. OTU abundance analysis was conducted within the R  
510 statistical environment v3.2.3, within the package PhyloSeq (v1.14.0) (McMurdie and  
511 Holmes, 2013). Sequences were rarefied using the command *rarefy\_even\_depth()* and then  
512 trimmed for OTUs with at least 2 reads in at least 90% of the samples. Abundances of an  
513 OTU were averaged across biological duplicates and a rank abundance matrix was  
514 calculated using the command *transform\_sample\_counts()* with the argument function of  
515  $\text{function}(x) \ x / \text{sum}(x)$ . Completed rarefied rank abundance OTU tables were plotted using  
516 the graphing program GGPlot2 (v. 2.0.0) (Wickham, 2011). All iTag sequences are  
517 available at the Short Read Archive with accession number SRR6235382-SRR6235415.

518

#### 519 *Growth experiments*

520 Salinity tolerance was tested by growing LSUCC0530 in different media distinguished by  
521 proportional changes in the concentration of major ions. All other media elements (carbon,

522 iron, phosphate, nitrogen, vitamins, and trace metals) were kept consistent. Media included  
523 JW1, JW2, JW3, and JW4, previously published (Henson *et al.*, 2016), and JW3.5, JW4.5, JW5,  
524 and JW6. Recipes for all media used in this study are provided in Table S1. Salinity  
525 tolerance experiments were conducted in quintuplicate at room temperature. Temperature  
526 range and sole carbon substrate use were tested using the isolation medium, JW5.  
527 Temperature range experiments were also conducted in quintuplicate. For all experiments,  
528 growth was measured using flow cytometry as described above.

529

### 530 *Microscopy*

531 Strain LSUCC0530 cells were grown to near max density ( $1 \times 10^7$  cells mL<sup>-1</sup>) in JW5 medium.  
532 Cells for transmission electron microscopy were prepared as previously described (Rappé  
533 *et al.*, 2002) with one minor change: centrifuged cells were concentrated in JW5 medium  
534 with no added fixative. Cells were visualized under a JEOL JSM-2011 High Resolution  
535 transmission electron microscope at the LSU Socolofsky Microscopy Center, Baton Rouge,  
536 LA. For scanning electron microscopy, cultured cells were fixed for four hours in 4%  
537 Glutaraldehyde buffered with 0.2M Cacodylate buffer and filtered onto a 0.2  $\mu$ m nylon filter  
538 (Pall, Michigan, USA). Samples were dehydrated in an ethanol series (30%, 50%, 70%, 96  
539 and 100%) for 15 minutes each, followed by critical point drying. Cells were visualized  
540 under a JEOL JSM-6610 scanning electron microscope at the LSU Socolofsky Microscopy  
541 Center, Baton Rouge, LA.

542

### 543 *Genome sequencing, assembly, and annotation*

544 Cells were grown in 1 L JW5 medium (Table S1) and filtered onto 0.2  $\mu$ m nylon filters (Pall,  
545 Michigan, USA). DNA was obtained via phenol-chloroform extraction and sequenced using  
546 both Illumina HiSeq and MiSeq approaches. *HiSeq*. 350 ng of DNA was sheared to ~500 bp  
547 with a Qsonica Q800R (Qsonica) using 16 cycles with an amplitude of 25% and pulse rate of  
548 20 seconds on, 20 seconds off. DNA was visualized on a 1.5% agarose gel stained with Gel  
549 Red (Biotum) to determine average sheared length and quantified using Qubit high  
550 sensitivity dsDNA assay kit (Invitrogen). Library prep was conducted following a modified  
551 Kapa Hyper Prep Kit protocol (Kapa Biosystems, Inc.). Briefly, we ligated end-repaired and  
552 adenylated DNA to universal Y-yoke oligonucleotide adapters and custom Illumina iTru  
553 dual-indexed primers (Glenn *et al.*, 2016). Prior to index amplification, post-ligation  
554 LSUCC0530 DNA was cleaned using 1.2x SPRI (Roland and Reich, 2012). Following a brief,  
555 8 cycle PCR amplification of the library to add indexes, the genomic library was quantified  
556 using a Qubit broad range dsDNA assay kit (Invitrogen). Illumina HiSeq 3000 sequencing  
557 was performed at Oklahoma Medical Research Facility using SBS kit chemistry to generate  
558 150 bp paired-end reads, insert size 400 bp. *MiSeq*. DNA was sent to the Argonne National  
559 Laboratory Environmental Sample Preparation and Sequencing Facility which performed  
560 library prep and sequencing, generating 250 bp paired-end reads, insert size 550 bp.

561 Due to the large number of reads from the HiSeq sequencing, we created a random  
562 subset using 14% of the total reads by using the program *seqtk* (v. 1.0-r75-dirty) and the  
563 flag `-s100`. We trimmed reads for adapter contamination and quality using Trimmomatic  
564 (Bolger *et al.*). Initial assembly with the subset of reads was done with SPAdes (Bankevich  
565 *et al.*, 2012). This generated a large single scaffold with overlapping ends. We performed a  
566 quality assessment of the single scaffold via iterations of Reapr (Hunt *et al.*, 2013)-advised  
567 scaffold breaks and SSPACE (Boetzer *et al.*, 2011) extensions using both the full set of HiSeq  
568 reads and the MiSeq reads. Final assessment of the scaffold with overlaps removed from  
569 the ends was performed with Pilon (Walker *et al.*, 2014) using all *HiSeq* reads mapped to  
570 the scaffold with BWA (Li and Durbin, 2009). No issues were reported. An analysis of the  
571 GC skew was performed on the final scaffold using the `gc_skew` script provided via Brown  
572 *et al.* 2015 (Brown *et al.*, 2015). Contamination and completion were also evaluated with  
573 CheckM (Parks *et al.*, 2015). Detailed commands and outputs for the assembly and quality  
574 assessment are provided in Supplementary Information. The final circular chromosome  
575 scaffold was annotated by IMG (Markowitz *et al.*, 2014) and is publicly available with IMG  
576 Taxon ID number 2728369501. It is also publicly available in GenBank with accession  
577 number CP024034. Genome sequencing reads are available in SRA with accession numbers  
578 SRR6257553 (MiSeq) and SRR6257608 (HiSeq).

579

#### 580 *Comparative genomics*

581 Orthologous clusters were determined using the Get Homologues pipeline (Contreras-  
582 Moreira and Vinuesa, 2013) using the LSUCC0530 genome and 48 publicly available SAR11  
583 genomes from IMG, including the 10 LD12 SAGs analyzed previously (Eiler *et al.*, 2016,  
584 Zaremba-Niedzwiedzka *et al.*, 2013) (Table S1). Clusters were determined from amino acid  
585 sequences using the OrthoMCL option in Get Homologues. All clusters are provided in  
586 `cluster_list.txt` as part of Supplemental Information. Average amino acid identity (AAI) and  
587 synteny were calculated as previously reported (Dick *et al.*, 2009). Average nucleotide  
588 identity (ANI) was calculated with the Konstantinidis Lab website ANI calculator  
589 (<http://enve-omics.ce.gatech.edu/ani/index>) as reported (Goris *et al.*, 2007). Compatible  
590 solutes identified in Table S1 were identified in SAR11 genomes using KO numbers,  
591 annotations, and cross-referenced with orthologous clusters.

592

#### 593 *Bacteriophage searches*

594 We looked for signatures of bacteriophage in the LSUCC0530 genome using two methods,  
595 VirSorter (Roux *et al.*, 2015) and PHASTER (Arndt *et al.*, 2016) with default settings.  
596 CRISPR regions are identified as part of the standard IMG annotation process, and none  
597 were found in LSUCC0530.

598

#### 599 *Phylogenomics*



600 We selected single-copy genes present in at least 39 of the 49 genomes as determined via  
601 Get Homologues (above). Amino acid sequences from these 83 markers were separately  
602 aligned with MUSCLE (Edgar, 2004), culled with Gblocks (Castresana, 2000), and  
603 concatenated into a superalignment totaling 23,356 positions. Inference was performed  
604 with RAxML (Stamatakis *et al.*, 2008) using the PROTCATLG model and 100 bootstrapping  
605 runs. All scripts (with settings) used in the alignment, culling, concatenation, and inference  
606 processes are available in Supplemental Information. Node labels were renamed with  
607 Newick Utilities (Junier and Zdobnov, 2010) *nw\_rename*, and the tree was visualized with  
608 Archaeopteryx (Han and Zmasek, 2009).

609

#### 610 *Single gene phylogeny*

611 The 16S rRNA gene sequence from the LSUCC0530 genome was aligned with 284  
612 alphaproteobacterial sequences and seven outgroup sequences. We completed  
613 phylogenetic inference for *aceA* and *malA* in an analogous manner. For each, the  
614 LSUCC0530 gene was searched against the NCBI nr database using blastp (v. 2.2.28). The  
615 top 100 sequence hits were combined with all homologous SAR11 sequences identified with  
616 Get Homologues for the *aceA* phylogeny, and both the *malA* and *malG* sequences in all  
617 SAR11s for the *malA* phylogeny. Sequences from redundant taxa were removed. For all  
618 trees, alignment with MUSCLE (Edgar, 2004), culling with Gblocks (Castresana, 2000), and  
619 tree inference with FastTree2 (Price *et al.*, 2010) was completed with the FT\_pipe script,  
620 provided in Supplemental Information, along with the initial fasta file containing all  
621 sequences and the newick tree output file. Node labels were changed with Newick Utilities  
622 (Junier and Zdobnov, 2010) *nw\_rename* and visualization was performed with  
623 Archaeopteryx (Han and Zmasek, 2009).

624

#### 625 *Metagenomic recruitment*

626 Scaffolds for the 49 SAR11 genomes, including strain LSUCC0530, used in the  
627 phylogenomic analyses were used for competitive recruitment of metagenomic sequences  
628 from 89 different samples. Prior to recruitment, multi-scaffold assemblies were condensed  
629 into single scaffolds, and all single scaffolds were used to generate a BLAST database with  
630 the command *makeblastdb* (BLAST v. 2.2.28). Metagenomic datasets from 90 different  
631 environmental samples of various salinities from the Baltic Sea (Dupont *et al.*, 2014),  
632 Amazon River, freshwater lakes (Eiler *et al.*, 2014, Martinez-Garcia *et al.*, 2011), Lagoon  
633 Albufera (Ghai *et al.*, 2012), Columbia River (Fortunato and Crump, 2015, Smith *et al.*,  
634 2013b), Lake Lanier (Oh *et al.*, 2011), Lake Michigan (Denef *et al.*, 2016), Feitsui Reservoir  
635 (Tseng *et al.*), and GOS (Rusch *et al.*, 2007) were downloaded from the Short Read Archive  
636 (SRA) and European Nucleotide Archive (ENA) using *ftp* and SRA toolkit (v.2.8.2-1),  
637 respectively. Reads from pyrosequencing were dereplicated with the program CD-HIT (v  
638 4.6) (Fu *et al.*, 2012) using the *cd-hit-454* command and flag -c 0.95. Illumina sequence data  
639 was converted from fastq to fasta files with the FastX toolkit (v. 0.0.13.2)

640 ([http://hannonlab.cshl.edu/fastx\\_toolkit](http://hannonlab.cshl.edu/fastx_toolkit)) using the command *fastq\_to\_fasta* with the flag –  
641 Q33. Metagenomic sequences were separated into 1 million sequence files and recruited  
642 against the SAR11 database with *blastn* (v. 2.2.28) with *-max\_target\_seqs 1*. Best hits for  
643 each metagenomic sequence were kept if the alignment length was > 90% of the median  
644 length of all metagenomic sequences for a given sample. Metagenomic recruitment was  
645 expressed in read density per genome using *ggplot2 geom\_density()* and reads per kilobase  
646 of genome per million mapped reads (RPKM) as previously reported (Thrash *et al.*, 2017).

647

#### 648 *Script availability*

649 All scripts used in this work can be found on the Thrash Lab website with the manuscript  
650 link at <http://thethrashlab.com/publications>.

651

#### 652 **Acknowledgements**

653 Funding for this work was provided in part by a Louisiana Board of Regents (grant  
654 LEQSF(2014-17)-RD-A-06) grant to JCT and the LSU Department of Biological Sciences  
655 (startup funds to JCT and BCF). The authors thank the LSU Socolofsky Microscopy Center  
656 for assistance with electron microscopy imaging. Portions of this research were conducted  
657 with high performance computing resources provided by Louisiana State University  
658 (<http://www.hpc.lsu.edu>). The authors also thank Katherine D. McMahon and Sarah L. R.  
659 Stevens for helpful commentary on the manuscript draft.

660

#### 661 **Author Contributions**

662 JCT designed the study; MWH conducted cultivation experiments, nucleic acid extraction,  
663 microscopy, and iTag and metagenomics analyses; JCT and BCF assembled the genome and  
664 conducted quality assessment; MWH, VCL, and JCT conducted comparative genomics  
665 analyses, metabolic reconstruction, phylogenetic, and phylogenomic analyses; JCT lead  
666 manuscript writing and all authors contributed to and reviewed the text.

667

#### 668 **Conflict of Interest**

669 The authors declare no conflict of interest.

670

671

672



673 **Tables and Figures**

674

675 **Table 1.** Compatible solute production and transport in SAR11

676

| Osmolyte system                                  | LSUCC0530 | LD12 SAGs | HIMB114 | IMCC9063 | Other SAR11 |
|--------------------------------------------------|-----------|-----------|---------|----------|-------------|
| Alanine synthesis                                | +         | +         | +       | +        | +           |
| Di-myo-inositol phosphate synthesis              | +/-       | +/-       | +/-     | +/-      | +/-         |
| Ectoine/hydroxyectoine transport                 | -         | -         | +       | +        | +           |
| Glutamate synthesis                              | +         | +         | +       | +        | +           |
| Glutamate transport                              | -         | +*        | -       | -        | -           |
| Glutamine synthesis                              | +         | +         | +       | +        | +           |
| Glycine synthesis                                | +         | +         | +       | +        | +           |
| Glycine betaine synthesis                        | -         | +/-*      | +       | +        | +           |
| Glycine betaine/proline ABC transporter          | -         | -         | +       | +        | +           |
| N- $\delta$ -Acetyl-ornithine synthesis          | +         | +         | +       | +        | +           |
| Potassium transport (antiporters K03549, K03455) | +         | +         | -       | -        | -           |
| Potassium transport (trkAH + K16052)             | -         | -         | +       | +        | +           |
| Proline synthesis                                | +         | +         | +       | +        | +           |
| Proline transport (symporter)                    | +         | +         | +       | +        | +           |
| Sodium transport (antiporter K03313)             | -         | -         | +       | +        | +           |
| Sodium transport (other antiporter)              | +         | +         | -       | -        | -           |
| Sorbitol synthesis                               | -         | -         | +       | -        | +           |
| Taurine transport                                | -         | -         | -       | -        | +           |
| TMAO synthesis                                   | -         | -         | -       | -        | +           |

677

678 + genes present; - genes absent; +/- partial pathway; \*B11 LD12 SAG only. Table shows  
 679 only systems with predicted genes in at least one SAR11 genome. Table only shows  
 680 systems for which genes could be identified in the SAR11 genomes examined in this study.  
 681 For a complete list of all systems searched, see Table S1.

682

683 **Figure Legends**

684

685 **Figure 1.** Phylogeny and morphology of LSUCC0530. **A)** Phylogenetic position of  
 686 LSUCC0530 within the SAR11 clade using a concatenation of 83 single copy marker genes  
 687 and 23,356 amino acid positions. The tree was inferred using RAxML with 100 bootstrap  
 688 runs. Values at the nodes indicate 100% bootstrap support unless otherwise noted. The  
 689 tree was rooted on HIMB59. Subclades are indicated on the right, and LD12 microclusters  
 690 are indicated A-C. Asterisk- we have included AAA028-C07 in microcluster A, even though  
 691 it was excluded previously (Zaremba-Niedzwiedzka *et al.*, 2013). **B)** Scanning electron  
 692 micrograph of LSUCC0530 cells at 35,000x magnification. Scale bar represents 0.5  $\mu$ m. **C)**  
 693 Transmission electron micrograph of a LSUCC0530 cell thin section. Scale bar represents

694 0.5  $\mu\text{m}$ .

695

696 **Figure 2.** Circular diagram of the LSUCC0530 genome. Rings indicate, from outside to the  
697 center: Position relative to the replication start site; Forward strand genes, colored by COG  
698 category; Reverse strand genes, colored by COG category; RNA genes (tRNAs green, rRNAs  
699 red, other RNAs black); GC content; GC skew.

700

701 **Figure 3.** Metabolic reconstruction of LSUCC0530. Solid boxes indicate recovered genes,  
702 dashed boxes indicate missing genes. Color shading distinguishes major metabolic sub-  
703 systems, which are also labeled in bold text. ABC transporters are depicted with circles  
704 indicating subunits. Symporters and antiporters are depicted with ovals. Two component  
705 systems are depicted with large and small rectangles. The C4 TRAP transporter is depicted  
706 separately. Major subsystems are colored for easier identification. Multiple arrows indicate  
707 all genes present in a given pathway. Numbers identify genes according to the key in Table  
708 S1. Question marks indicate a single missing gene in an otherwise complete pathway (e.g.,  
709 PRPP  $\rightarrow$  His). Light blue fill indicates genes with no SAR11 orthologs outside of the LD12  
710 subclade.

711

712 **Figure 4.** Growth rates for LSUCC0530 according to **A)** salinity and **B)** temperature. The  
713 boxes indicate the interquartile range (IQR) of the data, with vertical lines indicating the  
714 upper and lower extremes according to 1.5 x IQR. Horizontal lines within each box indicate  
715 the median. The underlying data points of individual biological replicates, calculated from  
716 corresponding growth curves in Figure S8, are plotted on top of each box.

717

718 **Figure 5.** Results of competitive metagenomic recruitment to all genomes used in the  
719 phylogenomic tree. **A)** 95% identity RPKM values for LD12 genomes only, by site, with data  
720 aggregated for all genomes in microclusters A-C, according to the key. Colors indicate broad  
721 environmental categories. **B-D)** Density plots of metagenomic sequence recruitment  
722 according to percent identity of the best hit. Data was aggregated according to the key, with  
723 LD12 separated as in A, HIMB59 separately depicted as "V", and all other SAR11 genomes  
724 together as "Other." **B)** Two sites where LSUCC0530 dominated recruitment with high  
725 percent identity. **C)** Two sites where the LSUCC0530 only recruited sequences at ~90%  
726 identity and no other group had high recruitment at higher identity. **D)** Two sites where  
727 other LD12 microclusters showed similar patterns as LSUCC0530 in B and C.

728

729

730 **References Cited**

- 731
- 732 Anstrom DM, Kallio K, Remington JS (2003). Structure of the Escherichia coli malate  
733 synthase G:pyruvate:acetyl - coenzyme A abortive ternary complex at 1.95 Å resolution.  
734 *Protein Science* **12**: 1822-1832.
- 735
- 736 Arndt D, Grant JR, Marcu A, Sajed T, Pon A, Liang Y *et al.* (2016). PHASTER: a better, faster  
737 version of the PHAST phage search tool. *Nucleic Acids Research* **44**.
- 738
- 739 Bankevich A, Nurk S, Antipov D, Gurevich AA, Dvorkin M, Kulikov AS *et al.* (2012). SPAdes:  
740 A New Genome Assembly Algorithm and Its Applications to Single-Cell Sequencing. *Journal*  
741 *of Computational Biology* **19**: 455-477.
- 742
- 743 Bèjà O, Spudich EN, Spudich JL, Leclerc M, DeLong EF (2001). Proteorhodopsin  
744 phototrophy in the ocean. *Nature* **411**: 786-789.
- 745
- 746 Boetzer M, Henkel CV, Jansen HJ, Butler D, Pirovano W (2011). Scaffolding pre-assembled  
747 contigs using SSPACE. *Bioinformatics* **27**: 578-579.
- 748
- 749 Bolger AM, Lohse M, Usadel B (2014). Trimmomatic: a flexible trimmer for Illumina  
750 sequence data. *Bioinformatics* **30**: 2114-2120.
- 751
- 752 Brown CT, Hug LA, Thomas BC, Sharon I, Castelle CJ, Singh A *et al.* (2015). Unusual biology  
753 across a group comprising more than 15% of domain Bacteria. *Nature* **523**: 208-211.
- 754
- 755 Cabello-Yeves PJ, Zemskaya TI, Rosselli R, Coutinho FH, Zakharenko AS, Blinov VV *et al.*  
756 (2018). Genomes of novel microbial lineages assembled from the sub-ice waters of Lake  
757 Baikal. *Appl Environ Microbiol* **84**: e02132-02117.
- 758
- 759 Carini P, Steindler L, Beszteri S, Giovannoni SJ (2013). Nutrient requirements for growth of  
760 the extreme oligotroph 'Candidatus Pelagibacter ubique' HTCC1062 on a defined medium.  
761 *ISME J* **7**: 592-602.
- 762
- 763 Carini P, Campbell EO, Morrè J, Sañudo-Wilhelmy SA, Thrash CJ, Bennett SE *et al.* (2014).  
764 Discovery of a SAR11 growth requirement for thiamin's pyrimidine precursor and its  
765 distribution in the Sargasso Sea. *ISME J* **8**: 1727-1738.
- 766
- 767 Carlson CA, Morris R, Parsons R, Treusch AH, Giovannoni SJ, Vergin KL (2009). Seasonal  
768 dynamics of SAR11 populations in the euphotic and mesopelagic zones of the northwestern  
769 Sargasso Sea. *ISME J* **3**: 283-295.
- 770
- 771 Castresana J (2000). Selection of conserved blocks from multiple alignments for their use in  
772 phylogenetic analysis. *Mol Biol Evol* **17**: 540-552.
- 773

- 774 Chun J, Oren A, Ventosa A, Christensen H, Arahal D, da Costa MS *et al.* (2018). Proposed  
775 minimal standards for the use of genome data for the taxonomy of prokaryotes. *IJSEM* **68**:  
776 461-466.  
777
- 778 Contreras-Moreira B, Vinuesa P (2013). GET\_HOMOLOGUES, a versatile software package  
779 for scalable and robust microbial pangenome analysis. *Appl Environ Microbiol* **79**: 7696-  
780 7701.  
781
- 782 Dattananda CS, Gowrishankar J (1989). Osmoregulation in *Escherichia coli*:  
783 complementation analysis and gene-protein relationships in the proU locus. *J Bacteriol*  
784 **171**: 1915-1922.  
785
- 786 Denev VJ, Mueller RS, Chiang E, Liebig JR, Vanderploeg HA (2016). Chloroflexi CL500-11  
787 Populations That Predominate Deep-Lake Hypolimnion Bacterioplankton Rely on  
788 Nitrogen-Rich Dissolved Organic Matter Metabolism and C1 Compound Oxidation. *Appl*  
789 *Environ Microbiol* **82**: 1423-1432.  
790
- 791 Denger K, Weinitschke S, Smits THM, Schleheck D, Cook AM (2008). Bacterial sulfite  
792 dehydrogenases in organotrophic metabolism: separation and identification in *Cupriavidus*  
793 *necator* H16 and in *Delftia acidovorans* SPH-1. *Microbiology* **154**: 256-263.  
794
- 795 Dick GJ, Andersson AF, Baker BJ, Simmons SL, Thomas BC, Yelton AP *et al.* (2009).  
796 Community-wide analysis of microbial genome sequence signatures. *Genome Biol* **10**: R85.  
797
- 798 Dupont CL, Larsson J, Yooseph S, Ininbergs K, Goll J, Asplund-Samuelsson J *et al.* (2014).  
799 Functional Tradeoffs Underpin Salinity-Driven Divergence in Microbial Community  
800 Composition. *PLOS ONE* **9**: e89549.  
801
- 802 Edgar RC (2004). MUSCLE: multiple sequence alignment with high accuracy and high  
803 throughput. *Nucleic Acids Research* **32**: 1792-1797.  
804
- 805 Eiler A, Zaremba-Niedzwiedzka K, Martinez-Garcia M, McMahon KD, Stepanauskas R,  
806 Andersson SGE *et al.* (2014). Productivity and salinity structuring of the microplankton  
807 revealed by comparative freshwater metagenomics. *Environmental Microbiology* **16**: 2682-  
808 2698.  
809
- 810 Eiler A, Mondav R, Sinclair L, Fernandez-Vidal L, Scofield DG, Schwientek P *et al.* (2016).  
811 Tuning fresh: radiation through rewiring of central metabolism in streamlined bacteria.  
812 *ISME J* **10**: 1902-1914.  
813
- 814 Empadinhas N, da Costa M (2008). Osmoadaptation mechanisms in prokaryotes:  
815 distribution of compatible solutes. *International Microbiology*.  
816
- 817 Fortunato CS, Crump BC (2015). Microbial Gene Abundance and Expression Patterns across  
818 a River to Ocean Salinity Gradient. *PLOS ONE* **10**.  
819

- 820 Fu L, Niu B, Zhu Z, Wu S, Li W (2012). CD-HIT: accelerated for clustering the next-  
821 generation sequencing data. *Bioinformatics* **28**: 3150-3152.  
822
- 823 Garcia SL, Stevens SLR, Crary B, Martinez-Garcia M, Stepanauskas R, Woyke T *et al.* (2017).  
824 Contrasting patterns of genome-level diversity across distinct co-occurring bacterial  
825 populations. *ISME J AOP* doi:[10.1038/s41396-017-0001-0](https://doi.org/10.1038/s41396-017-0001-0).  
826
- 827 Ghai R, Hernandez C, Picazo A, Mizuno C, Ininbergs K, Díez B *et al.* (2012). Metagenomes of  
828 Mediterranean Coastal Lagoons. *Sci Rep* **2**.  
829
- 830 Giovannoni SJ, Bibbs L, Cho J-C, Stapels MD, Desiderio R, Vergin KL *et al.* (2005a).  
831 Proteorhodopsin in the ubiquitous marine bacterium SAR11. *Nature* **438**: 82-85.  
832
- 833 Giovannoni SJ, Tripp HJ, Givan S, Podar M, Vergin KL, Baptista D *et al.* (2005b). Genome  
834 streamlining in a cosmopolitan oceanic bacterium. *Science* **309**: 1242-1245.  
835
- 836 Giovannoni SJ, Vergin KL (2012). Seasonality in ocean microbial communities. *Science* **335**:  
837 671-676.  
838
- 839 Glenn TC, Nilsen R, Kieran TJ, Finger JW, Pierson TW, Bentley KE *et al.* (2016). Adapterama  
840 I: Universal stubs and primers for thousands of dual-indexed Illumina libraries (iTru &  
841 iNext). *bioRxiv*.  
842
- 843 Goris J, Konstantinidis KT, Klappenbach JA, Coenye T, Vandamme P, Tiedje JM (2007).  
844 DNA-DNA hybridization values and their relationship to whole-genome sequence  
845 similarities. *IJSEM* **57**: 81-91.  
846
- 847 Grote J, Thrash JC, Huggett MJ, Landry ZC, Carini P, Giovannoni SJ *et al.* (2012). Streamlining  
848 and Core Genome Conservation among Highly Divergent Members of the SAR11 Clade.  
849 *mBio* **3**: e00252-00212.  
850
- 851 Han MV, Zmasek CM (2009). phyloXML: XML for evolutionary biology and comparative  
852 genomics. *BMC Bioinformatics* **10**: 1-6.  
853
- 854 Henson MW, Pitre DM, Weckhorst J, Lanclos VC, Webber AT, Thrash JC (2016). Artificial  
855 Seawater Media Facilitate Cultivating Members of the Microbial Majority from the Gulf of  
856 Mexico. *mSphere* **1**: e00028-00016. doi:[00010.01128/mSphere.00028-00016](https://doi.org/10.1128/mSphere.00028-00016).  
857
- 858 Herlemann D, Woelk J, Labrenz M, Jürgens K (2014). Diversity and abundance of  
859 “Pelagibacterales” (SAR11) in the Baltic Sea salinity gradient. *Syst Appl Microbiol* **37**: 601-  
860 604.  
861
- 862 Hunt M, Kikuchi T, Sanders M, Newbold C, Berriman M, Otto TD (2013). REAPR: a universal  
863 tool for genome assembly evaluation. *Genome Biol* **14**: 1-10.  
864

- 865 Jimenez-Infante F, Ngugi D, Vinu M, Blom J, Alam I, Bajic VB *et al.* (2017). Genomic  
866 Characterization of Two Novel SAR11 Isolates From the Red Sea, Including the First Strain  
867 of the SAR11 Ib clade. *FEMS Microbiol Ecol.*  
868
- 869 Junier T, Zdobnov EM (2010). The Newick utilities: high-throughput phylogenetic tree  
870 processing in the Unix shell. *Bioinformatics* **26**: 1669-1670.  
871
- 872 Kappler U (2011). Bacterial sulfite-oxidizing enzymes. *Biochimica et Biophysica Acta (BBA)*  
873 *- Bioenergetics* **1807**: 1-10.  
874
- 875 Konstantinidis KT, Tiedje JM (2005). Genomic insights that advance the species definition  
876 for prokaryotes. *Proc Natl Acad Sci USA* **102**: 2567-2572.  
877
- 878 Konstantinidis KT, Tiedje JM (2007). Prokaryotic taxonomy and phylogeny in the genomic  
879 era: advancements and challenges ahead. *Current Opinion in Microbiology* **10**: 504-509.  
880
- 881 Li H, Durbin R (2009). Fast and accurate short read alignment with Burrows–Wheeler  
882 transform. *Bioinformatics* **25**: 1754-1760.  
883
- 884 Logares R, Bråte J, Bertilsson S, Clasen JL, Shalchian-Tabrizi K, Rengefors K (2009).  
885 Infrequent marine–freshwater transitions in the microbial world. *Trends in Microbiology*  
886 **17**: 414-422.  
887
- 888 Logares R, Brate J, Heinrich F, Shalchian-Tabrizi K, Bertilsson S (2010). Infrequent  
889 Transitions between Saline and Fresh Waters in One of the Most Abundant Microbial  
890 Lineages (SAR11). *Mol Biol Evol* **27**: 347-357.  
891
- 892 Luo H, Csúros M, Hughes AL, Moran M (2013). Evolution of Divergent Life History  
893 Strategies in Marine Alphaproteobacteria. *mBio* **4**: e00373-00313.  
894
- 895 Markowitz VM, Chen IMA, Palaniappan K, Chu K, Szeto E, Pillay M *et al.* (2014). IMG 4  
896 version of the integrated microbial genomes comparative analysis system. *Nucleic Acids*  
897 *Research* **42**: D560-567.  
898
- 899 Martinez-Garcia M, Swan BK, Poulton NJ, Gomez M, Masland D, Sieracki ME *et al.* (2011).  
900 High-throughput single-cell sequencing identifies photoheterotrophs and  
901 chemoautotrophs in freshwater bacterioplankton. *ISME J* **6**: 113-123.  
902
- 903 McMurdie PJ, Holmes S (2013). phyloseq: An R Package for Reproducible Interactive  
904 Analysis and Graphics of Microbiome Census Data. *PLOS ONE* **8**: e61217.  
905
- 906 Morris RM, Rappé MS, Connon SA, Vergin KL, Siebold WA, Carlson CA *et al.* (2002). SAR11  
907 clade dominates ocean surface bacterioplankton communities. *Nature* **420**: 806-810.  
908
- 909 Newton RJ, Jones SE, Eiler A, McMahon KD, Bertilsson S (2011). A Guide to the Natural  
910 History of Freshwater Lake Bacteria. *Microbiol Mol Biol Rev* **75**: 14-49.



911  
912 Oh S, Caro-Quintero A, Tsementzi D, DeLeon-Rodriguez N, Luo C, Poretsky R *et al.* (2011).  
913 Metagenomic Insights into the Evolution, Function, and Complexity of the Planktonic  
914 Microbial Community of Lake Lanier, a Temperate Freshwater Ecosystem. *Appl Environ*  
915 *Microbiol* **77**: 6000-6011.  
916  
917 Parada AE, Needham DM, Fuhrman JA (2015). Every base matters: assessing small subunit  
918 rRNA primers for marine microbiomes with mock communities, time series and global field  
919 samples. *Environmental Microbiology* **18**.  
920  
921 Parks DH, Imelfort M, Skennerton CT, Hugenholtz P, Tyson GW (2015). CheckM: assessing  
922 the quality of microbial genomes recovered from isolates, single cells, and metagenomes.  
923 *Genome Research* **25**: 1043-1055.  
924  
925 Piwosz K, Salcher MM, Zeder M, Ameryk A, Pernthaler J (2013). Seasonal dynamics and  
926 activity of typical freshwater bacteria in brackish waters of the Gulf of Gdańsk. *Limnology*  
927 *and Oceanography* **58**: 817-826.  
928  
929 Price MN, Dehal PS, Arkin AP (2010). FastTree 2--approximately maximum-likelihood trees  
930 for large alignments. *PLOS ONE* **5**: e9490.  
931  
932 Pruesse E, Quast C, Knittel K, Fuchs BM, Ludwig W, Peplies J *et al.* (2007). SILVA: a  
933 comprehensive online resource for quality checked and aligned ribosomal RNA sequence  
934 data compatible with ARB. *Nucleic Acids Research* **35**: 7188-7196.  
935  
936 Rappé MS, Connon SA, Vergin KL, Giovannoni SJ (2002). Cultivation of the ubiquitous  
937 SAR11 marine bacterioplankton clade. *Nature* **418**: 630-633.  
938  
939 Rodriguez-Valera F, Martin-Cuadrado A-B, Rodriguez-Brito B, Pašić L, Thingstad FT,  
940 Rohwer F *et al.* (2009). Explaining microbial population genomics through phage  
941 predation. *Nat Rev Micro* **7**: 828-836.  
942  
943 Roland N, Reich D (2012). Cost-effective, high-throughput DNA sequencing libraries for  
944 multiplexed target capture. *Genome Research* **22**: 939-946.  
945  
946 Roux S, Enault F, Hurwitz BL, Sullivan MB (2015). VirSorter: mining viral signal from  
947 microbial genomic data. *PeerJ* **3**.  
948  
949 Rusch DB, Halpern AL, Sutton G, Heidelberg KB, Williamson S, Yooseph S *et al.* (2007). The  
950 Sorcerer II Global Ocean Sampling Expedition: Northwest Atlantic through Eastern Tropical  
951 Pacific. *Plos Biol* **5**: e77.  
952  
953 Salcher MM, Pernthaler J, Posch T (2011). Seasonal bloom dynamics and ecophysiology of  
954 the freshwater sister clade of SAR11 bacteria 'that rule the waves' (LD12). *ISME J* **5**: 1242-  
955 1252.  
956



- 957 Schattenhofer M, Fuchs BM, Amann R, Zubkov MV, Tarran GA, Pernthaler J (2009).  
958 Latitudinal distribution of prokaryotic picoplankton populations in the Atlantic Ocean.  
959 *Environmental Microbiology* **11**: 2078-2093.  
960
- 961 Schloss PD, Westcott SL, Ryabin T, Hall JR, Hartmann M, Hollister EB *et al.* (2009).  
962 Introducing mothur: Open-Source, Platform-Independent, Community-Supported Software  
963 for Describing and Comparing Microbial Communities. *Appl Environ Microbiol* **75**: 7537-  
964 7541.  
965
- 966 Schwabach MS, Tripp HJ, Steindler L, Smith DP, Giovannoni SJ (2010). The presence of the  
967 glycolysis operon in SAR11 genomes is positively correlated with ocean productivity.  
968 *Environmental Microbiology* **12**: 490-500.  
969
- 970 Smith DP, Thrash JC, Nicora CD, Lipton MS, Burnum-Johnson KE, Carini P *et al.* (2013a).  
971 Proteomic and Transcriptomic Analyses of “Candidatus Pelagibacter ubique” Describe the  
972 First PII-Independent Response to Nitrogen Limitation in a Free-Living  
973 Alphaproteobacterium. *mBio* **4**: 12.  
974
- 975 Smith DP, Nicora CD, Carini P, Lipton MS, Norbeck AD, Smith RD *et al.* (2016). Proteome  
976 Remodeling in Response to Sulfur Limitation in “Candidatus Pelagibacter ubique”.  
977 *mSystems* **1**: 16.  
978
- 979 Smith MW, Allen L, Allen AE, Herfort L, Simon HM (2013b). Contrasting genomic properties  
980 of free-living and particle-attached microbial assemblages within a coastal ecosystem.  
981 *Front Microbiol* **4**.  
982
- 983 Song J, Oh H-M, Cho J-C (2009). Improved culturability of SAR11 strains in dilution-to-  
984 extinction culturing from the East Sea, West Pacific Ocean. *FEMS Microbiology Letters* **295**:  
985 141-147.  
986
- 987 Stamatakis A, Hoover P, Rougemont J (2008). A Rapid Bootstrap Algorithm for the RAxML  
988 Web Servers. *Systematic Biology* **57**: 758-771.  
989
- 990 Steindler L, Schwabach MS, Smith DP, Chan F, Giovannoni SJ (2011). Energy Starved  
991 Candidatus Pelagibacter Ubique Substitutes Light-Mediated ATP Production for  
992 Endogenous Carbon Respiration. *PLOS ONE* **6**: e19725.  
993
- 994 Stingl U, Tripp HJ, Giovannoni SJ (2007). Improvements of high-throughput culturing  
995 yielded novel SAR11 strains and other abundant marine bacteria from the Oregon coast  
996 and the Bermuda Atlantic Time Series study site. *ISME J* **1**: 361-371.  
997
- 998 Sun J, Steindler L, Thrash JC, Halsey KH, Smith DP, Carter AE *et al.* (2011). One Carbon  
999 Metabolism in SAR11 Pelagic Marine Bacteria. *PLOS ONE* **6**: e23973.  
1000

- 1001 Sun J, Todd JD, Thrash CJ, Qian Y, Qian MC, Temperton B *et al.* (2016). The abundant marine  
1002 bacterium *Pelagibacter* simultaneously catabolizes dimethylsulfoniopropionate to the  
1003 gases dimethylsulfide and methanethiol. *Nature Microbiology* **1**.  
1004
- 1005 Thrash J, Seitz KW, Baker BJ, Temperton B, Gillies LE, Rabalais NN *et al.* (2017). Metabolic  
1006 Roles of Uncultivated Bacterioplankton Lineages in the Northern Gulf of Mexico “Dead  
1007 Zone”. *mBio* **8**.  
1008
- 1009 Thrash JC, Temperton B, Swan BK, Landry ZC, Woyke T, DeLong EF *et al.* (2014). Single-cell  
1010 enabled comparative genomics of a deep ocean SAR11 bathytype. *ISME J* **8**: 1440-1451.  
1011
- 1012 Tripp HJ, Kitner JB, Schwalbach MS, Dacey JWH, Wilhelm LJ, Giovannoni SJ (2008). SAR11  
1013 marine bacteria require exogenous reduced sulphur for growth. *Nature* **452**: 741-744.  
1014
- 1015 Tsementzi D, Wu J, Deutsch S, Nath S, Rodriguez-R LM, Burns AS *et al.* (2016). SAR11  
1016 bacteria linked to ocean anoxia and nitrogen loss. *Nature* **536**: 179-183.  
1017
- 1018 Tseng C-H, Chiang P-W, Shiah F-K, Chen Y-L, Liou J-R, Hsu T-C *et al.* (2013). Microbial and  
1019 viral metagenomes of a subtropical freshwater reservoir subject to climatic disturbances.  
1020 *ISME J* **7**: 2374-2386.  
1021
- 1022 Walker BJ, Abeel T, Shea T, Priest M, Abouelliel A, Sakthikumar S *et al.* (2014). Pilon: An  
1023 Integrated Tool for Comprehensive Microbial Variant Detection and Genome Assembly  
1024 Improvement. *PLOS ONE* **9**.  
1025
- 1026 Wickham H (2011). ggplot2. *Wiley Interdisciplinary Reviews: Computational Statistics* **3**:  
1027 180-185.  
1028
- 1029 Wilhelm LJ, Tripp JH, Givan SA, Smith DP, Giovannoni SJ (2007). Natural variation in SAR11  
1030 marine bacterioplankton genomes inferred from metagenomic data. *Biology Direct* **2**: 1-19.  
1031
- 1032 Zaremba-Niedzwiedzka K, Viklund J, Zhao W, Ast J, Sczyrba A, Woyke T *et al.* (2013). Single-  
1033 cell genomics reveal low recombination frequencies in freshwater bacteria of the SAR11  
1034 clade. *Genome Biol* **14**: 1-14.  
1035
- 1036 Zhao X, Schwartz CL, Pierson J, Giovannoni SJ, McIntosh RJ, Nicastro D (2017). Three-  
1037 Dimensional Structure of the Ultraoligotrophic Marine Bacterium “*Candidatus Pelagibacter*  
1038 *ubique*”. *Appl Environ Microbiol* **83**: 16.  
1039
- 1040 Zhao Y, Ben T, Thrash JC, Schwalbach MS, Vergin KL, Landry ZC *et al.* (2013). Abundant  
1041 SAR11 viruses in the ocean. *Nature* **494**: 357-360.  
1042  
1043



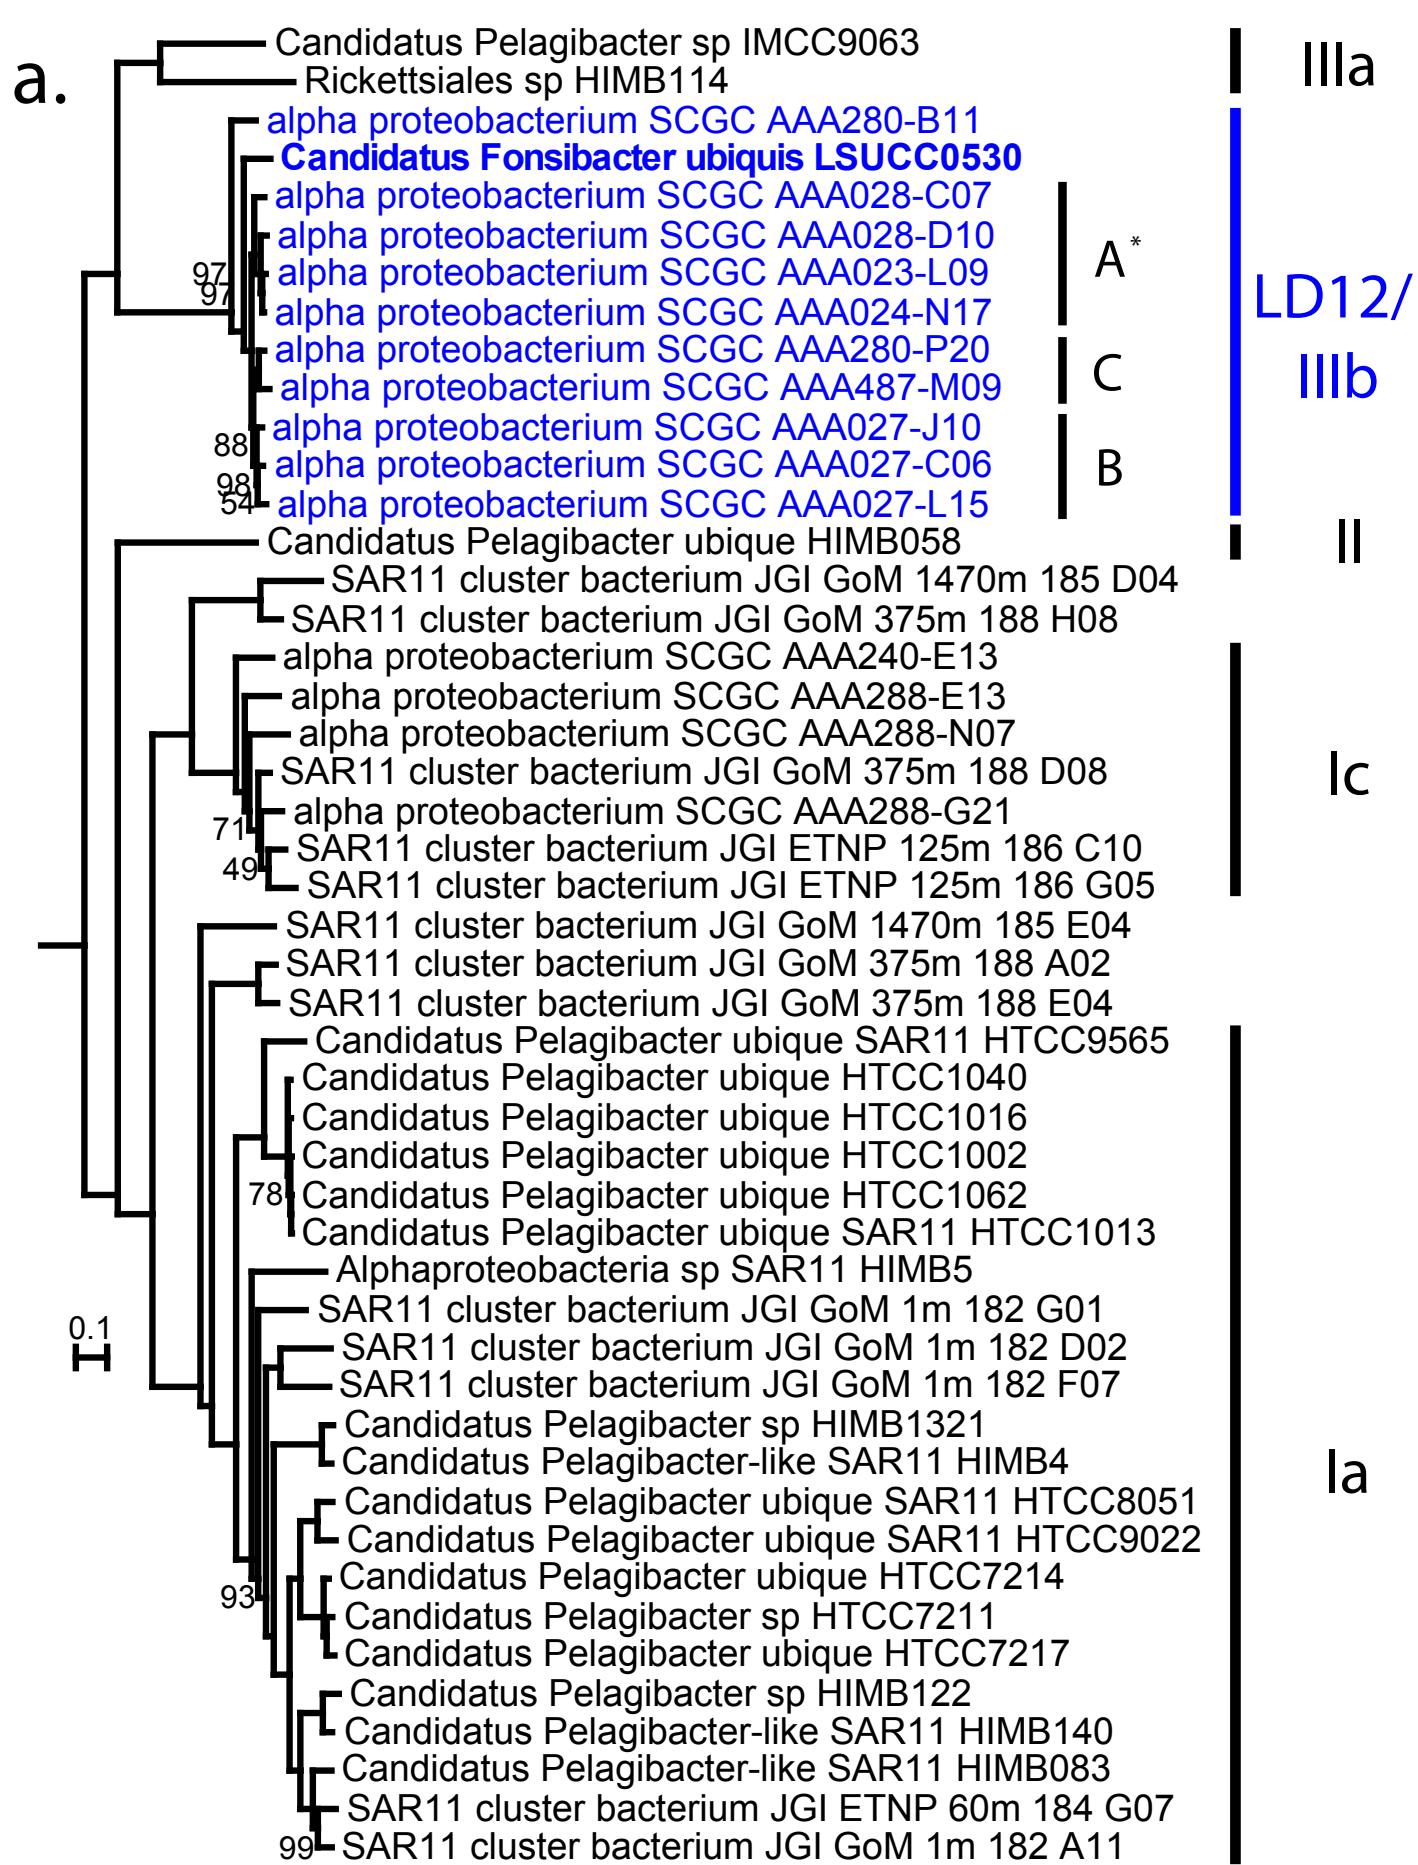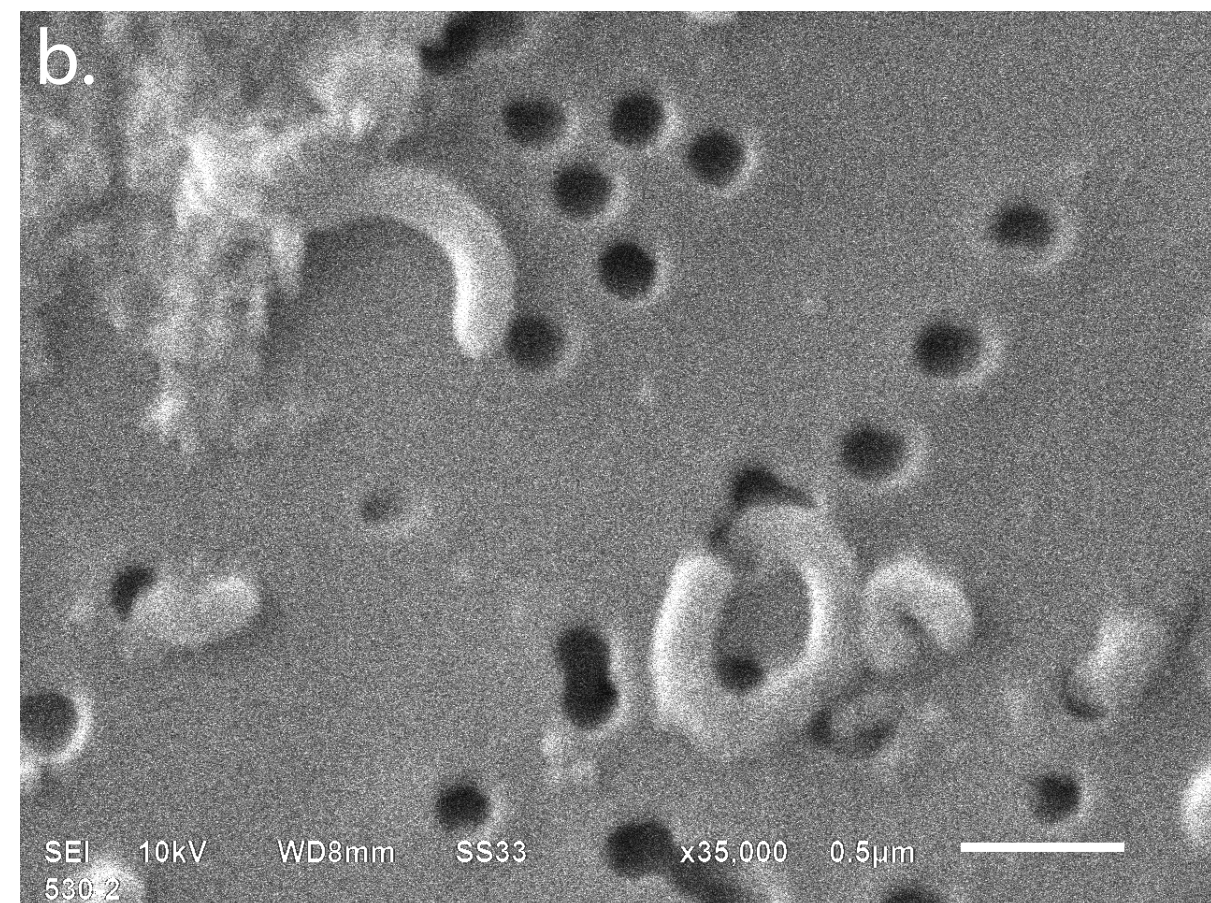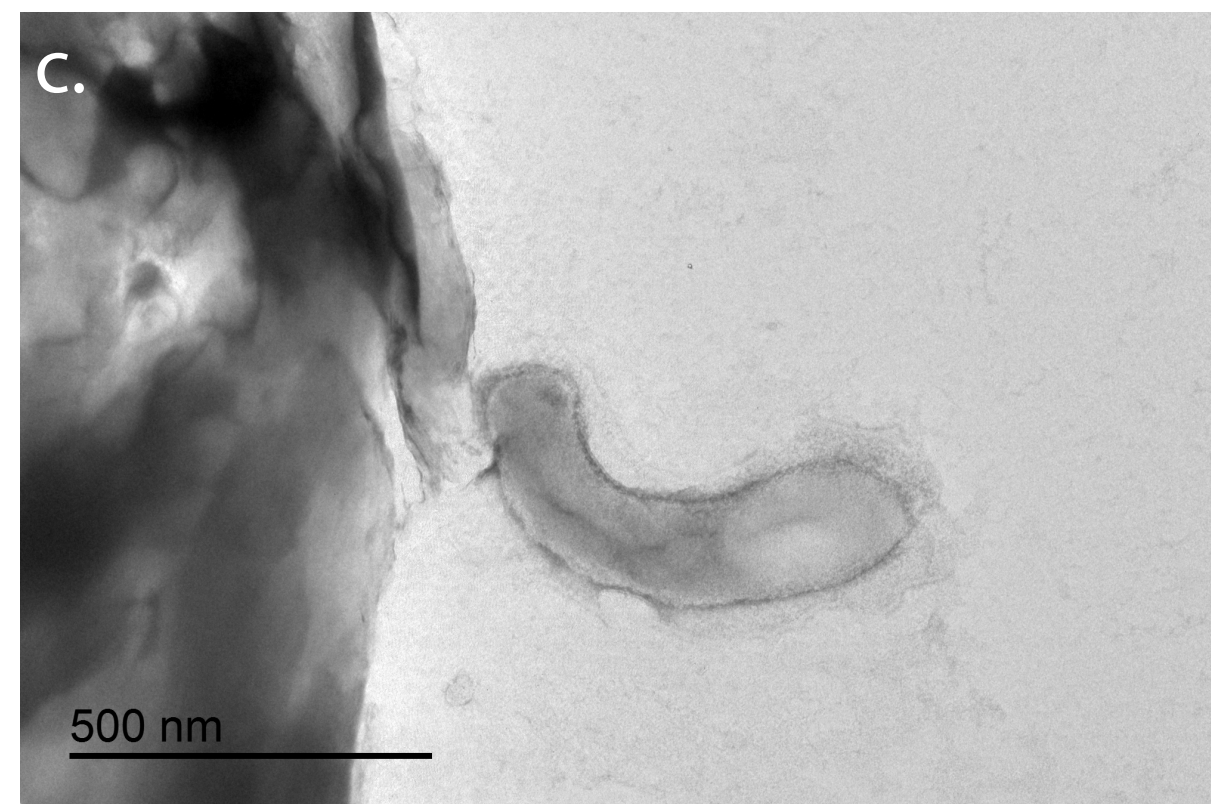



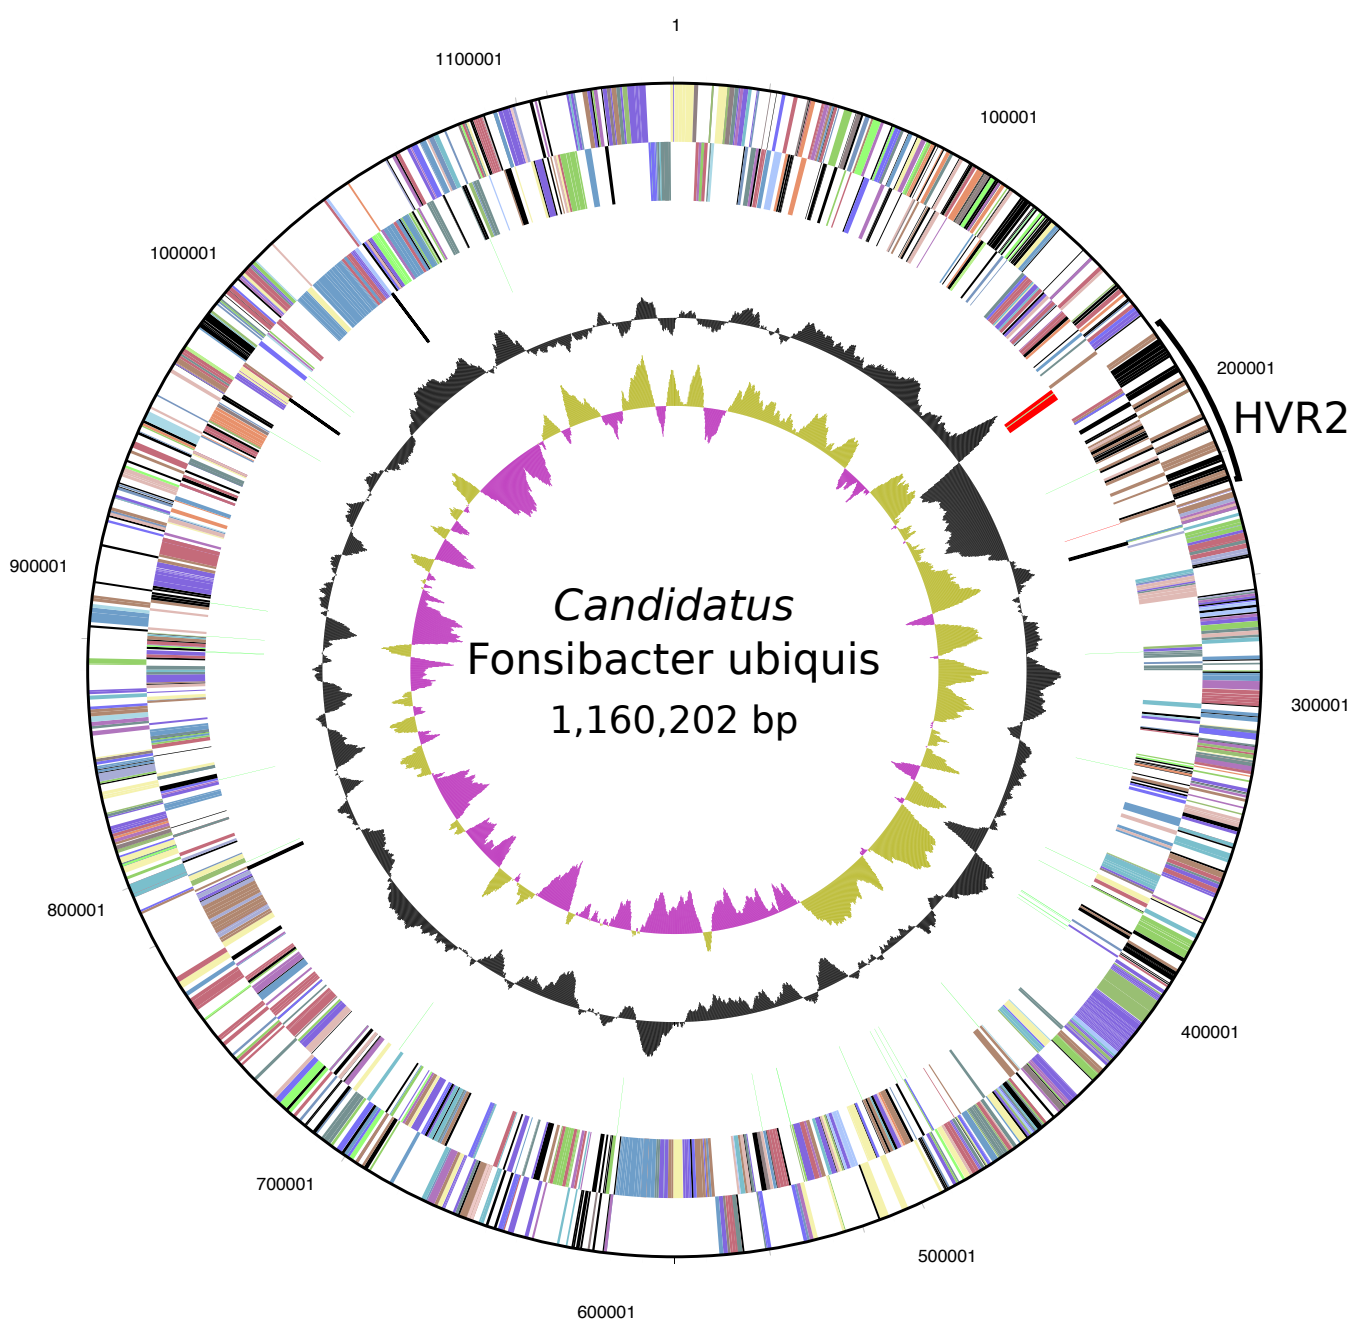

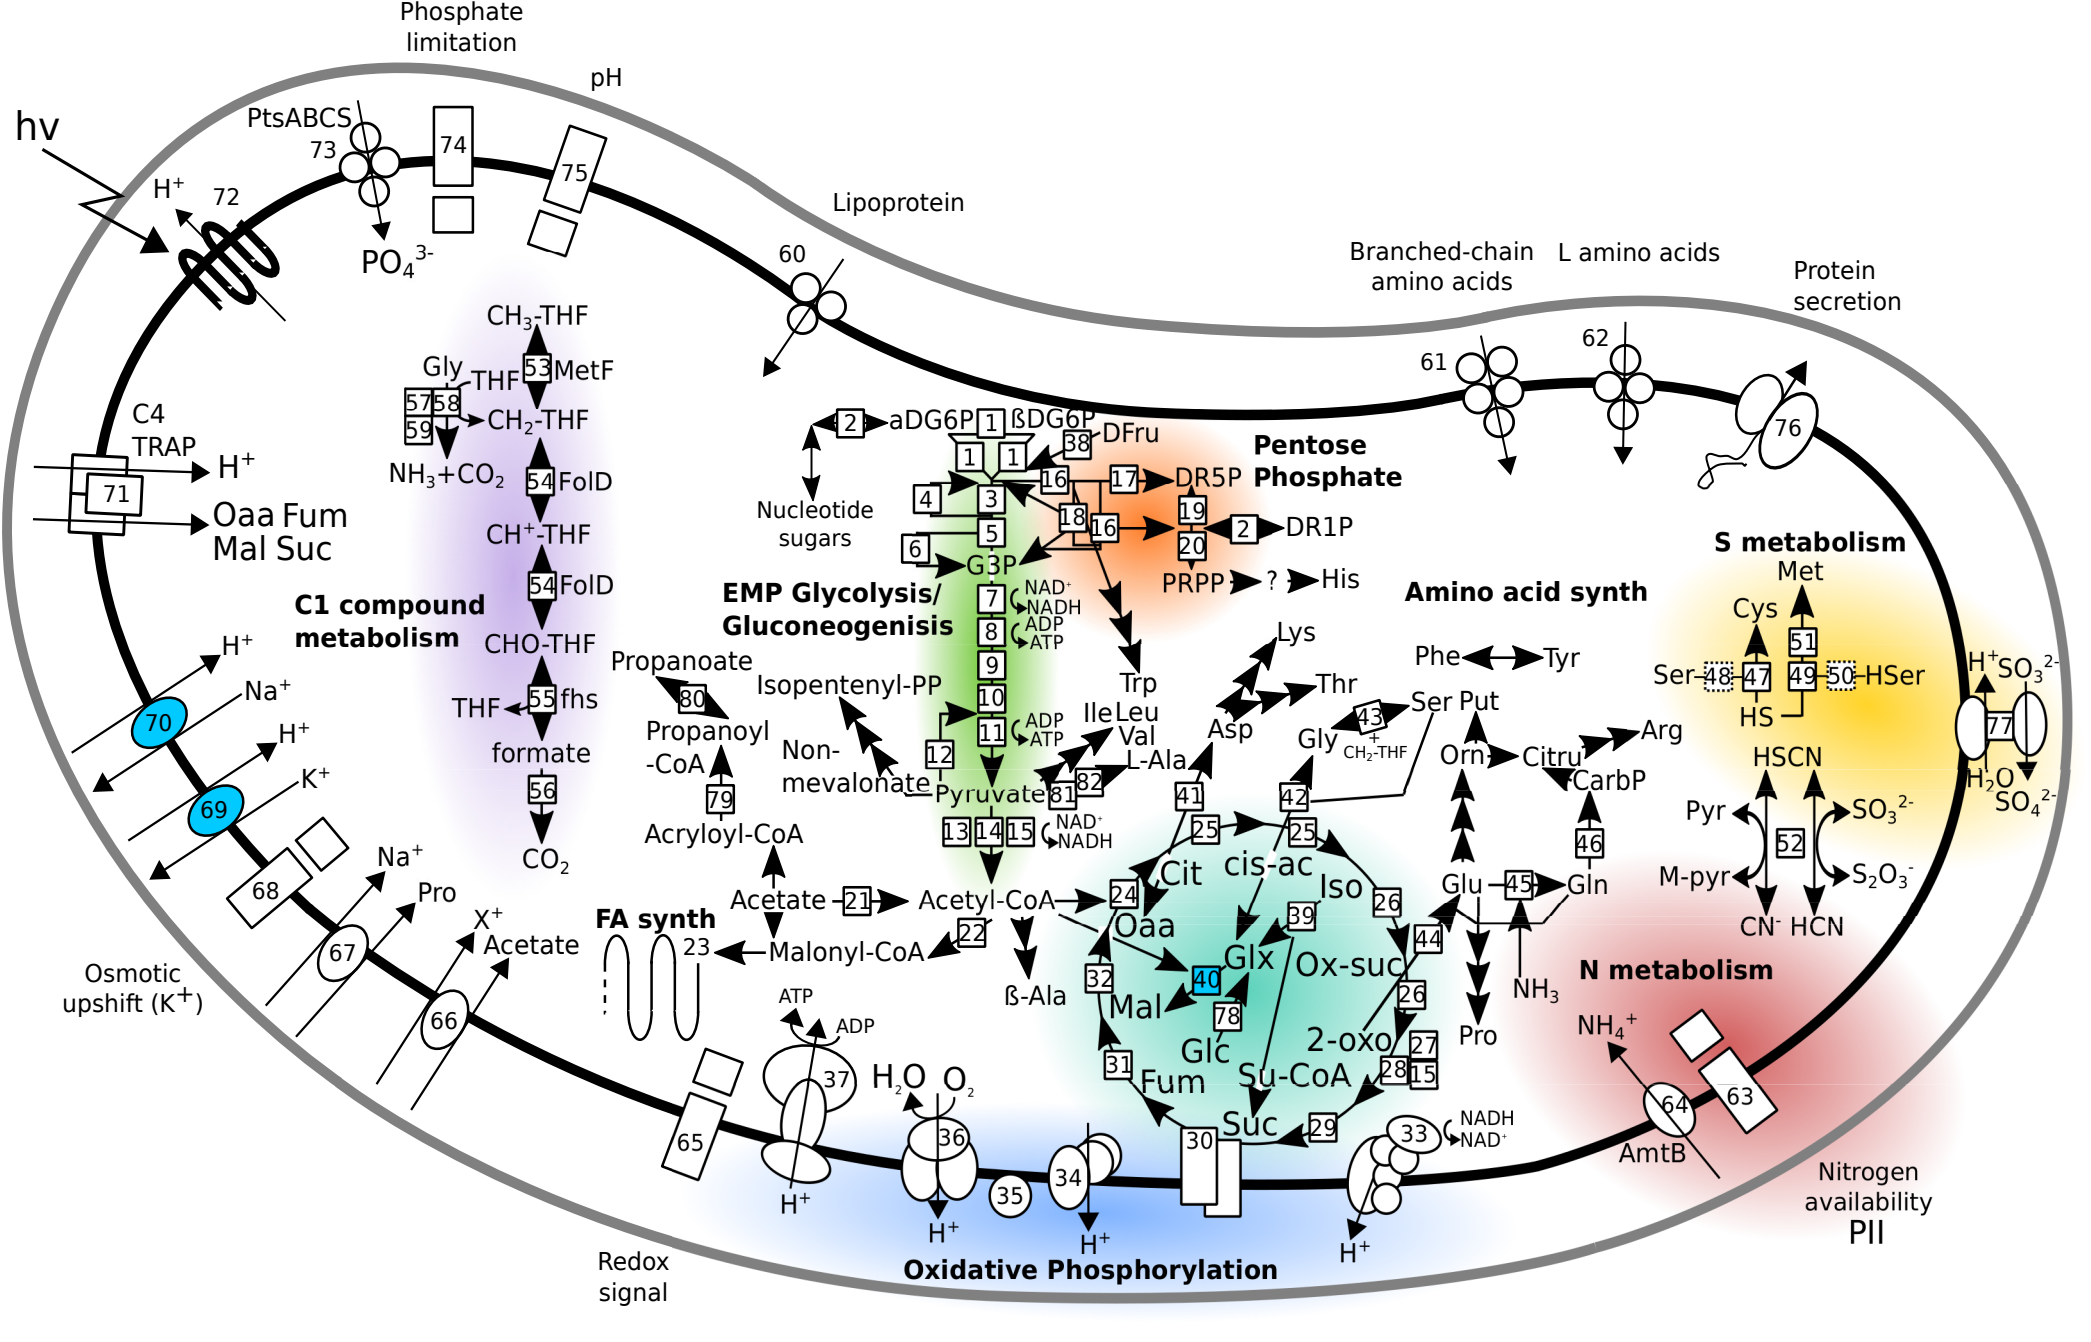

a.

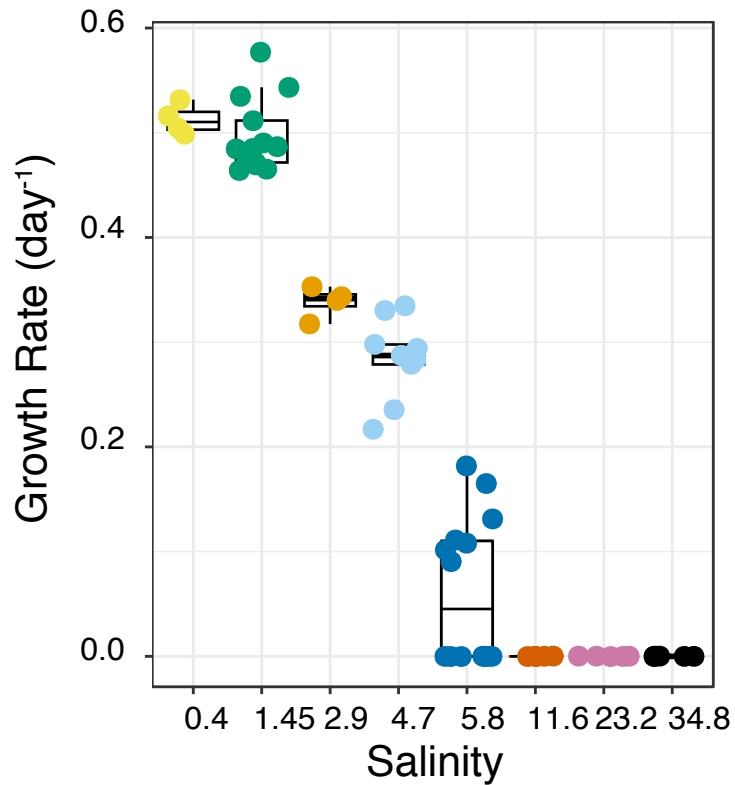

b.

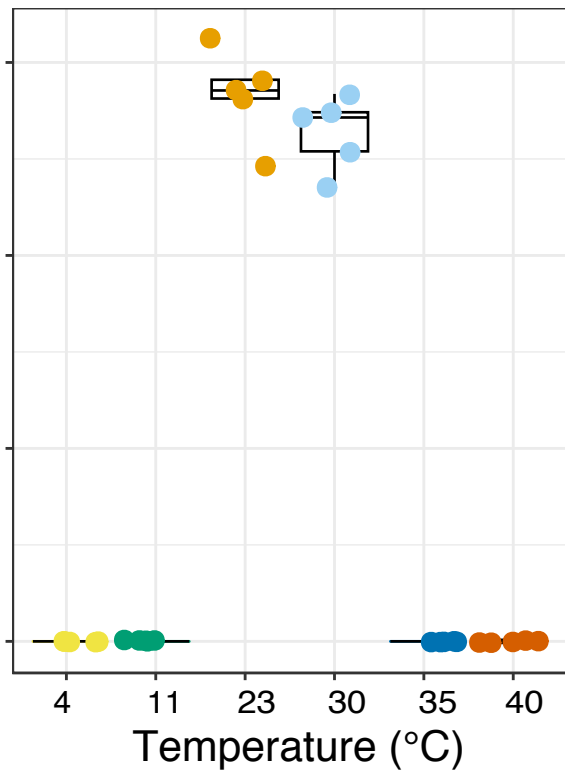

**a.**

LD12 Micro cluster

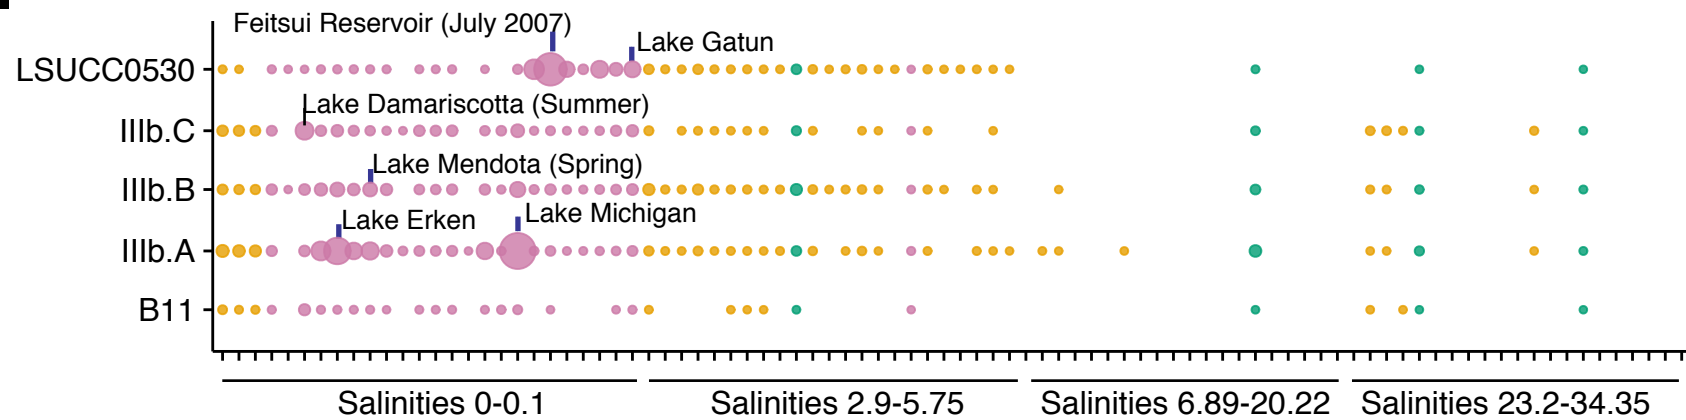**Environment**

● Baltic Sea

● Coastal

● Rivers and Lakes

**RPKM**

● 1

● 20

● 40

● 60

**b.**

Density

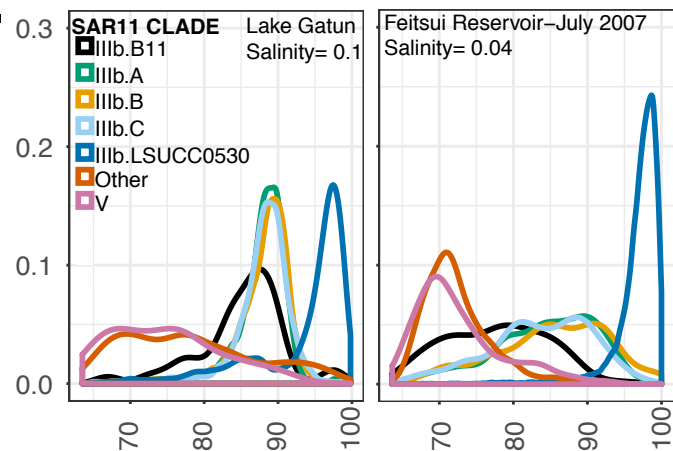**c.**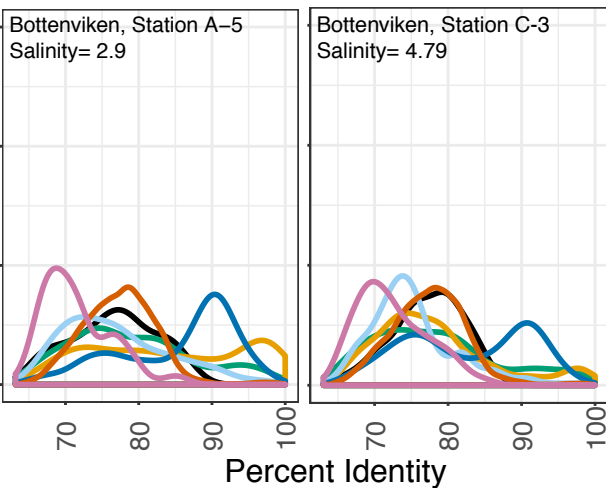**d.**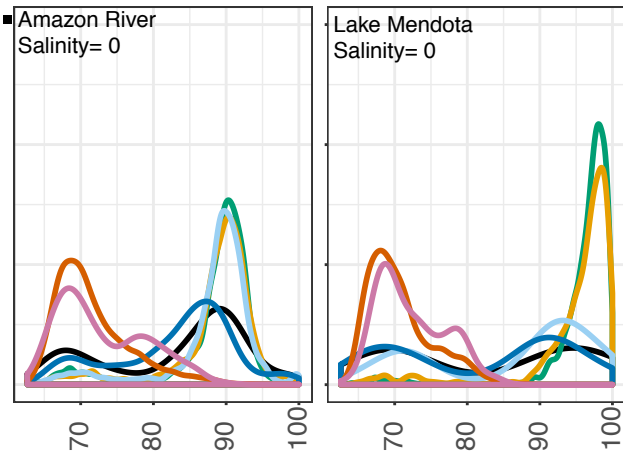

Source: https://www.biorxiv.org/content/10.1101/093567v5.full.pdf
